1 **Alterations in gut microbiota linked to provenance, sex, and chronic wasting disease in**  
2 **white-tailed deer (*Odocoileus virginianus*)**

3

4 David Minich<sup>1</sup>, Christopher Madden<sup>2</sup>, Morgan V. Evans<sup>2</sup>, Gregory A. Ballash<sup>1</sup>, Daniel J. Barr<sup>3</sup>,  
5 Keith P. Poulsen<sup>3</sup>, Patricia M. Dennis<sup>2,4</sup>, Vanessa L. Hale<sup>2</sup>

6

7 <sup>1</sup>The Ohio State University College of Veterinary Medicine, Columbus, OH

8 <sup>2</sup>Veterinary Preventive Medicine, The Ohio State University, Columbus, OH

9 <sup>3</sup>Wisconsin Veterinary Diagnostic Laboratory, University of Wisconsin-Madison, WI

10 <sup>4</sup>Cleveland Metroparks Zoo, Cleveland, OH

11

12 **Abstract**

13 Chronic wasting disease (CWD) is a fatal, contagious, neurodegenerative prion disease affecting  
14 both free-ranging and captive cervid species. CWD is spread via direct or indirect contact or oral  
15 ingestion of prions. In the gastrointestinal tract, prions enter the body through microfold cells  
16 (M-cells), and the abundance of these cells can be influenced by the gut microbiota. To explore  
17 potential links between the gut microbiota and CWD, we collected fecal samples from farmed  
18 and free-ranging white-tailed deer (*Odocoileus virginianus*) around the Midwest. Farmed deer  
19 originated from farms that were depopulated due to CWD. Free-ranging deer were sampled  
20 during annual deer harvests. All farmed deer were tested for CWD via ELISA and IHC, and we  
21 used 16S rRNA gene sequencing to characterize the gut microbiota. We report significant  
22 differences in gut microbiota by provenance (Farm 1, Farm 2, Free-ranging), sex, and CWD  
23 status. CWD-positive deer from Farm 1 and 2 had increased abundances of *Akkermansia*,  
24 *Lachnospireacea* UCG-010, and RF39 taxa. Overall, differences by provenance and sex appear  
25 to be driven by diet, while differences by CWD status may be linked to CWD pathogenesis.

26

27

28

## 29 **Introduction**

30 Chronic wasting disease (CWD) is a fatal, contagious, neurodegenerative prion disease affecting  
31 both free-ranging and captive cervid species, including white-tailed deer (*Odocoileus*  
32 *virginianus*), mule deer (*Odocoileus hemionus*), elk (*Cervus elaphus elaphus*), and moose (*Alces*  
33 *alces*). First identified in Colorado, USA in the 1960s, CWD was given the designation as a  
34 transmissible spongiform encephalopathy (TSE) in 1978 <sup>1,2</sup>. Other TSEs include bovine  
35 spongiform encephalopathy, transmissible mink encephalopathy, kuru, and variant and sporadic  
36 Creutzfeldt-Jakob Disease (CJD) <sup>1</sup>. Since the 1960s, CWD has spread across North America and  
37 has been identified in cervids in 26 states <sup>3</sup>. Outside of the United States, CWD has been  
38 documented in Korea, Canada <sup>1</sup>, and Norway <sup>4</sup>. Clinical signs of CWD include progressive  
39 weight loss, altered posture, head tremors, ataxia, and polydipsia and polyphagia<sup>1</sup>.  
40 Pathologically, CWD causes spongiform lesions within the central nervous system caused by an  
41 abnormal, diseased isoform (PrP<sup>CWD</sup>) of the normal cellular prion protein (PrP<sup>C</sup>). PrP<sup>C</sup> is  
42 typically composed of multiple alpha-helices, but the abnormal isoform undergoes a  
43 transformation into a beta-sheet conformation, making it resistant to proteases, high  
44 temperatures, and standard disinfection protocols <sup>1</sup>. The extreme hardiness of the diseased prion,  
45 as well as an incubation period ranging from 18 months to 5 years <sup>1</sup>, makes CWD extremely  
46 challenging to control and manage.

47  
48 CWD is commonly shed in the saliva, urine, feces, and skin and is spread via direct or indirect  
49 contact with infectious prions and environmental fomites <sup>5</sup>. There is evidence that after oral  
50 ingestion and passage into the intestinal tract, prions enter the body through microfold cells (M-  
51 cells) <sup>6,7</sup>. M-cells are specialized cells found in lymphoid follicles, the appendix, mucosal  
52 associated lymphoid tissue (MALT), and in the follicle-associated epithelium (FAE) of Peyer's  
53 patches in the gut <sup>8</sup>. M-cells are considered the gatekeeper of the intestine, as they continuously  
54 sample and internalize material from the lumen of the intestine via transcytosis to the underlying  
55 lymphoid tissue in the Peyer's patch for initiation of mucosal and systemic immune responses <sup>7-  
56 9</sup>. Studies in mice have shown that after oral entry of a TSE agent, prions initially accumulate in  
57 Peyer's patches and mesenteric lymph nodes in the gut <sup>7,10</sup>. Increased M-cell abundance has  
58 been linked to an increased susceptibility to orally acquired prion diseases, and the absence of  
59 M-cells at the time of oral exposure to infectious prions blocks neuroinvasion and disease

60 development<sup>6</sup>. Importantly, M-cell abundance can be influenced by microbes in the gut as well  
61 as by enteric inflammation, and M-cell induction and development has been linked to  
62 inflammatory cytokine stimulation and pathogen infection<sup>11–13</sup>. Further, a 2009 study<sup>14</sup> found  
63 that mice with intestinal inflammation as a result of increased levels of *Salmonella* had a  
64 significantly higher risk of prion disease. Therefore, increased abundance of M-cells in the gut  
65 due to a concurrent inflammation or due to increased levels of specific microbes, such as  
66 *Salmonella*<sup>14,15</sup>, could potentially enhance uptake of prions from the gut lumen<sup>12</sup>.

67  
68 The gut microbiota serves as a defense system against pathogens and other disease-causing  
69 agents<sup>16</sup>. Furthermore, the gut microbiome plays an important role in host immune development  
70<sup>17</sup>, neurogenesis<sup>18</sup>, brain development<sup>19</sup>, and microglia function in the central nervous system  
71 (CNS)<sup>20,21</sup>. The gut microbiome has also been linked to human neurologic conditions via the  
72 “gut-brain axis<sup>21</sup>.” Both Parkinson’s Disease (PD) and Alzheimer’s Disease (AD) have  
73 similarities to prion diseases and involve abnormal protein aggregates and protein misfolding  
74 occurring in the brain, including a conversion of alpha-helical structures to beta-sheet structures  
75 in PD<sup>22–26</sup>. As a result of these similarities, the “prion hypothesis” suggests that PD is a prion-  
76 like disease<sup>27</sup>. Studies indicate a critical relationship between the gut microbiota and neurologic  
77 diseases, including PD, AD, amyotrophic lateral sclerosis (ALS), and autism<sup>21,28–32</sup>. In a 2016  
78 study, alpha synuclein-overexpressing mice (a mouse model for PD) treated with antibiotics had  
79 an altered gut microbiota and exhibited reduced brain pathology and motor deficits, identifying  
80 direct links between alterations in the gut microbiota and brain pathology associated with PD.  
81 Further, microbial colonization of germ-free mice with stool samples from patients with PD  
82 resulted in the disease-typical protein-misfolding-mediated motor deficits<sup>31</sup>. Although there is  
83 growing evidence for the role of gut microbes in neurologic diseases, there has been very little  
84 work examining the role of gut microbiota in prion diseases and no published studies, to our  
85 knowledge, on gut microbial communities and chronic wasting disease.

86  
87 In this study, we used 16S rRNA gene sequencing to examine the gut microbiota of white-tailed  
88 deer (*Odocoileus virginianus*) from two deer farms (breeding facilities) that were depopulated  
89 due to the presence of CWD. Additionally, we characterized the gut microbiota of free-ranging  
90 white-tailed deer harvested from Cleveland Metroparks in northeast Ohio as part of its deer

91 population management program. Based on previous studies that have reported differences in the  
92 gut microbiota of wild and captive ruminants, including deer<sup>33</sup>, we hypothesized that microbial  
93 communities would differ between deer by provenance (Farm 1, Farm 2, and Free-ranging) with  
94 the greatest differences being observed between farmed and free-ranging deer. Based on studies  
95 that have reported alterations in gut microbiota associated with neurologic disease, we  
96 hypothesized that we would observe differences in farmed-deer gut microbial communities by  
97 CWD status (CWD-positive, CWD non-detect).

98

## 99 **Methods**

### 100 **Fecal Sample Collection**

101 Per United States Department of Agriculture (USDA) regulations, all deer on Farm 1 (n=101)  
102 and Farm 2 (n=30) (Wisconsin, USA) were euthanized after a deer from each farm tested  
103 positive for CWD at harvest. Farm 1 was depopulated in May 2018, and Farm 2 was depopulated  
104 in May 2019. Post-euthanasia, deer were transported to the Wisconsin Veterinary Diagnostic  
105 Laboratory (WVDL) for CWD enzyme-linked immunosorbent assay (ELISA) testing. The  
106 WVDL is a National Animal Health Laboratory Network Level 1 laboratory and is accredited by  
107 the American Association of Veterinary Laboratory Diagnosticians. Regulatory surveillance  
108 samples were shipped to the National Veterinary Services Laboratory (NVSL) for CWD  
109 Immunohistochemistry (IHC).

110 Fecal samples were collected digitally from the rectum of all deer and stored on dry ice until they  
111 were transferred into a -80°C freezer. Fresh gloves were donned for sampling each deer. Samples  
112 remained at -80°C until DNA extraction was performed. All deer carcasses were disposed of  
113 after sampling via an alkaline tissue digester at the WVDL. One hundred and one deer were  
114 sampled from Farm 1; thirty deer were sampled from Farm 2 (**Table 1**).

### 115 **Table 1: Farm 1, Farm 2, and Free-Ranging Deer Demographics**

116

| <b>Farm 1</b>                       |                     |                       |
|-------------------------------------|---------------------|-----------------------|
|                                     | <b>CWD Positive</b> | <b>CWD Non-Detect</b> |
| Total Number of Deer                | 20                  | 81                    |
| Age at Depopulation (mean $\pm$ SD) | 2.59 $\pm$ 1.02     | 4.37 $\pm$ 3.43       |
| Sex (n, %)                          |                     |                       |
| Female                              | 1 (1)               | 35 (35)               |
| Male                                | 19 (19)             | 46 (45)               |
| <b>Farm 2</b>                       |                     |                       |
| Total Number of Deer                | 6                   | 24                    |
| Age at Depopulation (mean $\pm$ SD) | 2.76 $\pm$ 0.39     | 3.22 $\pm$ 2.71       |
| Sex (n, %)                          |                     |                       |
| Female                              | 0 (0)               | 12 (40)               |
| Male                                | 6 (20)              | 12 (40)               |
| <b>Free-Ranging Deer</b>            |                     | <b>Total</b>          |
| Total Number of Deer                |                     | 100                   |
| Age at Depopulation (mean $\pm$ SD) |                     | 1.70 $\pm$ 1.01       |
| Sex (n, %)                          |                     |                       |
| Female                              |                     | 50 (50)               |
| Male                                |                     | 50 (50)               |

117

118 One hundred fecal samples were also obtained from free-ranging white-tailed deer harvested in  
119 the Cleveland Metroparks (January – March, 2018; **Table 1**), as part of a deer population  
120 management program that includes regular CWD testing. Cleveland Metroparks deer herds were  
121 tested for CWD in 2008 (125 deer), 2011 (53 deer), 2012 (50 deer), 2016 (277 deer), and 2020  
122 (135 deer), and none were found to have detectable CWD. Harvested deer were brought to a  
123 central location within four hours of death, and a fecal sample was obtained from the rectum of  
124 each deer, placed in a sterile plastic bag, and frozen at -20°C. Samples were transferred into a -  
125 80°C freezer within 24 hours of collection where they remained until DNA extraction.

126 Samples from deer on Farm 1 and 2 were collected under USDA APHIS permit #136689. Post-  
127 mortem collection of feces was deemed exempt by the IACUC.

128

### 129 **CWD Sample Collection and Testing**

130 The head was removed from all farmed deer greater than one year of age and the obex region of  
131 the brainstem and medial retropharyngeal lymph nodes were collected following USDA APHIS  
132 guidelines<sup>34</sup>. IHC and ELISA-based testing for the abnormal prion protein were performed on  
133 the dorsal motor nucleus of the vagus nerve in the obex and medial retropharyngeal lymph

134 nodes. For IHC testing, tissues were preserved in 10% neutral buffered formalin, embedded in  
135 paraffin, sectioned at 5  $\mu$ m, mounted on slides, and examined using IHC with monoclonal  
136 antibody (Mab) F99/97.6.1<sup>35</sup>. Animals were considered CWD-positive if any one of the tissues  
137 examined contained detectable PrP<sup>CWD</sup>. Animals in which tissues did not contain detectable  
138 PrP<sup>CWD</sup> were considered CWD non-detect animals.

### 139 **DNA Extraction, Amplification, and Sequencing**

140 DNA extraction on all fecal samples was performed as follows: Approximately 0.25 grams of  
141 stool was used for each extraction with QIAamp PowerFecal DNA Kits (Qiagen, Venlo,  
142 Netherlands). Following DNA isolation, DNA concentration and purity was measured using a  
143 Qubit Fluorometer 4 (Invitrogen, Carlsbad, CA, USA) and a NanoDrop 1000 Spectrophotometer  
144 (Thermo Scientific, Waltham, MA, USA), respectively. Ethanol precipitation was performed on  
145 all DNA samples from Farm 1 to improve DNA purity using a protocol<sup>36</sup> from MRC Holland  
146 (Amsterdam, Netherlands). Briefly, 4  $\mu$ l of sodium acetate and 132  $\mu$ L of 200 proof ethanol was  
147 added to 40  $\mu$ L of the DNA. This was incubated for 30 minutes at 4°C then centrifuged for 30  
148 minutes at 4°C. After removing the supernatant, 250  $\mu$ L of 70% ethanol was added to the DNA  
149 and centrifuged for 15 minutes. The supernatant was again removed and the DNA pellet was  
150 resuspended in 40  $\mu$ L of the C6 elution buffer from the PowerFecal (Qiagen) DNA isolation kits.  
151 All DNA samples were submitted for library preparation and 16S rRNA gene sequencing on an  
152 Illumina MiSeq (Farm 1 and Free-ranging: The Ohio State University Molecular and Cellular  
153 Imaging Center; Farm 2 samples: Argonne National Laboratory). Earth Microbiome Project  
154 primers (515F and 806R) were used to amplify the V4 hypervariable region of the bacterial 16S  
155 rRNA gene<sup>37</sup>.

156

### 157 **Sequence Processing and Analysis**

158 A total of 231 samples were submitted for sequencing. Raw, paired-end reads were processed  
159 and denoised in QIIME2 v. 2020.2<sup>38</sup>. Taxonomy was assigned using the SILVA 132 99%  
160 amplicon sequence variants (ASVs) database from the 515F/806R classifier<sup>39,40</sup>, and samples  
161 were filtered at a sequencing depth of 10,000 features. This resulted in the retention of 229  
162 samples with the loss of 2 samples – one CWD non-detect male deer from Farm 1 and one CWD  
163 non-detect female deer from the free-ranging population. After filtering, 5,803,410 reads from

164 229 samples were used for analysis (average of 25,342 reads per sample). Reads per sample  
165 ranged from 10,049 to 92,179 reads. Alpha (Shannon Diversity Index) and beta diversity were  
166 analyzed using QIIME 2<sup>38</sup>. Beta diversity indices were compared using permutational  
167 multivariate analysis of variances (PERMANOVA) between weighted and unweighted Unifrac  
168 distance matrices. P-values were corrected for multiple comparisons using the Benjamini-  
169 Hochberg FDR correction, and values less than 0.05 were considered significant. An analysis of  
170 composition of microbes (ANCOM) was used to determine differentially abundant taxa between  
171 groups after filtering out taxa that had fewer than 10 reads and taxa that occurred in fewer than  
172 two deer. We performed ANCOMs at both the L7 and amplicon sequence variant (ASV) levels.  
173 The L7 level is roughly equivalent to a species level while an ASV is roughly equivalent to a  
174 bacterial strain and may differ from another ASV by as few as one nucleotide<sup>41</sup>. Multiple ASVs  
175 may be classified as a single L7 level taxa. However, deeper genome sequencing is necessary for  
176 true species and strain differentiation as this is not feasible with amplicon sequencing alone. The  
177 single CWD-positive female was not included in statistical analyses comparing CWD-positive  
178 and CWD non-detect animals to reduce any confounding introduced by sex. Sequencing data is  
179 available at NCBI Bioproject PRJNA688284.

180

## 181 **Results**

### 182 **Microbial Composition and Diversity by Provenance and Sex**

183 When we examined the gut microbiota of all deer (n=229), we found significant differences in  
184 gut microbial composition and diversity by provenance (Farm 1, Farm 2, Free-ranging), with  
185 farmed deer having greater microbial diversity than free-ranging deer (Unweighted UniFrac  
186 PERMANOVA  $p = 0.001$ , Shannon Diversity Index  $q = 6.5 \times 10^{-11}$ , Weighted UniFrac  
187 PERMANOVA  $p = 0.001$ ; **Fig. 1a, b, Supp. Fig. 1a**). Moreover, farmed deer from both farms  
188 had more similar gut microbiota to each other than to free-ranging deer (Farm 1 to Farm 2  
189 pseudo-F = 9,  $q = 0.001$ ; Farm 1 to Free-ranging pseudo-F = 38,  $q = 0.001$ ; Farm 2 to Free-  
190 ranging pseudo F = 18,  $q = 0.001$ ; **Fig. 1c**).

191

192 To identify microbial taxa that were differentially abundant between farmed and free-ranging  
193 deer, we combined all deer from Farm 1 and 2 – excluding CWD-positive deer – and compared  
194 these against the free-ranging deer. Through an ANCOM at the L7 (roughly species) level, we

195 identified 82 taxa that were differentially abundant (**Supp. Table 1**). Twenty-six of these taxa  
196 were in the order Bacteroidales (phylum Bacteroidetes) and seven of these were in the family  
197 *Prevotellaceae*. The vast majority of the Bacteroidales taxa (22 of 26) were significantly  
198 increased in the farmed deer. On the other hand, free-ranging deer had significantly greater  
199 abundances of taxa (25 of 38) in the Clostridiales order (phylum Firmicutes), all of which were  
200 in the *Ruminococcaceae* and *Lachnospiraceae* families. Based on these results, we decided to  
201 compare log Firmicutes:Bacteroidetes (F:B) ratios for farmed and free-ranging deer. Log F:B  
202 ratios are associated with dietary energy harvest and higher ratios indicate greater energy  
203 extraction<sup>42-44</sup>. We found significantly higher F:B ratios in the free-ranging deer as compared to  
204 the farmed deer (Log F:B ratios (mean  $\pm$  SE), Free-ranging:  $0.39 \pm 0.03$ ; Farmed:  $0.08 \pm 0.02$ ;  
205 Kruskal-Wallis  $p < 0.0001$ ).

206  
207 We also discovered significant differences in microbial composition but not diversity by sex on  
208 Farm 1 and in free-ranging deer (CWD non-detect deer only; Farm 1: Unweighted UniFrac  
209 PERMANOVA  $p = 0.008$ , Shannon Diversity Index  $p = 0.34$ , Weighted UniFrac PERMANOVA  
210  $p = 0.003$ ; Free-ranging: Unweighted UniFrac PERMANOVA  $p = 0.018$ , Shannon Diversity  
211 Index  $p = 0.53$ , Weighted UniFrac PERMANOVA  $p = 0.066$ ; **Fig. 2a, b, Supp. Fig. 1b**). No  
212 significant differences in microbial composition or diversity were detected by sex on Farm 2  
213 (CWD non-detect deer only; Farm 2: Unweighted UniFrac PERMANOVA  $p = 0.179$ , Shannon  
214 Diversity Index  $p = 0.15$ , Weighted UniFrac PERMANOVA  $p = 0.115$ ; **Fig. 2a, b, Supp. Fig.**  
215 **1b**). There were also no differentially abundant microbial taxa detected by sex on Farm 2.  
216 However, on Farm 1, we identified a single taxa that was significantly increased in males. This  
217 was an uncultured bacterium from the order Bacteroidales, family RF16 (ANCOM, L7 - roughly  
218 species level,  $W = 626$ ). In the free-ranging deer population, there were multiple differentially  
219 abundant taxa by sex, with the two most differentially abundant including a microbe in the  
220 genera *Oscillibacter* and a microbe in the family *Lachnospiraceae*, genera GCA-900066575.  
221 Both of these taxa were significantly increased in males (**Supp. Table 2**).

222

### 223 **Microbial Composition and Diversity by CWD Status**

224 Based on the microbial composition differences observed by sex and the fact that there was only  
225 one CWD-positive female in the entire data set, we opted to analyze only male deer in relation to



226 CWD status. The single CWD-positive female deer was still included in data visualizations.  
227 Microbial composition differed significantly in CWD-positive deer on both farms (Males only;  
228 Farm 1: Unweighted UniFrac PERMANOVA  $p = 0.003$  Weighted UniFrac PERMANOVA  $p =$   
229  $0.011$ ; Farm 2: Unweighted UniFrac PERMANOVA  $p = 0.003$ , Weighted UniFrac  
230 PERMANOVA  $p = 0.002$ ; **Fig. 1a, Supp. Fig. 1a**). Increased microbial diversity (Shannon  
231 Index), although not significant, was also observed in CWD-positive males on both farms (Farm  
232 1  $p = 0.07$ ; Farm 2  $p = 0.26$ ; **Fig. 2b**).

233  
234 We further discovered several differentially abundant microbes at the L7 and ASV levels  
235 between CWD-positive and CWD non-detect males on both farms. (Note, multiple ASVs may be  
236 classified as a single L7, roughly species level, taxa.) On Farm 1, at the L7 level, multiple taxa  
237 were differentially abundant between CWD-positive and CWD non-detect males, the top four of  
238 which included: an uncultured bacterium from the class Bacilli (formerly Mollicutes), order  
239 RF39, increased in CWD-positive males (ANCOM  $W = 80$ ; **Fig. 3a**); an uncultured *Paludibacter*  
240 species increased in non-detect males (ANCOM  $W = 54$ ); an uncultured bacterium in the order  
241 Gastranaerophilales also increased in non-detect males (ANCOM  $W = 34$ ); and a microbe in the  
242 family *Lachnospiraceae* UCG-10 increased in CWD-positive males (ANCOM  $W = 28$ ; **Fig. 3c**)  
243 (**Supp. Table 3**). (ANCOM  $W$  values represent the number of times the null hypothesis is  
244 rejected in pairwise comparisons of microbial species ratios between groups. In other words, for  
245 the Bacilli RF39 L7 level taxa, the null hypothesis was rejected 80 times when comparing  
246 microbial species ratios between CWD positive and non-detect animals.)

247  
248 On Farm 2, at the L7 level, two microbes were found to be differentially abundant. Both were  
249 increased in CWD-positive males and included a unidentified rumen bacterium from the class  
250 Bacilli, order RF39 (ANCOM  $W = 132$ ; **Fig. 3b**) and a microbe from the family  
251 *Lachnospiraceae* UCG-10 (ANCOM  $W = 115$ ; **Fig. 3c**). On Farm 2, multiple ASVs were also  
252 differentially abundant (**Supp. Table 4**), the top three of which, all increased in CWD-positive  
253 males, were an ASV from the class Bacilli (formerly Mollicutes), order RF39 (ANCOM  $W =$   
254  $132$ ; **Fig. 3e**), an ASV from the family *Lachnospiraceae* UCG-10 (ANCOM  $W = 176$ ; **Fig. 3f**),  
255 and an uncultured ASV from the family *Akkermansia* (ANCOM  $W = 90$ ; **Fig. 3g**). On Farm 1, at  
256 the ASV level, only one microbe was found to be differentially abundant: an ASV in the

257 *Akkermansia* family which was increased in CWD-positive males (ANCOM  $W = 1958$ ; **Fig. 3h**).  
258 *Akkermansia* taxa at the L7 level were not differentially abundant on either farm (**Fig. 3d**).

259

## 260 **Discussion**

261 In this study, we used 16S rRNA gene sequencing to compare the gut microbiota of farmed and  
262 free-ranging white-tailed deer (*Odocoileus virginianus*). We hypothesized that deer gut  
263 microbiota would differ by provenance (Farm 1, Farm 2, and Free-ranging) and disease status  
264 (CWD-positive, CWD non-detect). Indeed, microbial composition and diversity did vary with  
265 provenance. Moreover, composition but not diversity varied with sex (Farm 1 and Free-ranging  
266 only) and with CWD status (Farm 1 and Farm 2).

267

### 268 *Drivers of microbial community composition by provenance*

269 Multiple factors could contribute to the gut microbial differences we observed based on  
270 provenance, including diet, spatial proximity, host genetics, and biogeography. Diet is one of the  
271 main factors that influences gut microbial composition and diversity<sup>45,46</sup>. The free-ranging deer  
272 in this study had diets that primarily consisted of browse, small plants, shrubs, grasses and  
273 occasional agricultural, landscaping, and garden plants<sup>47</sup>. The farmed deer had access to  
274 pastures and were also fed a variety of commercial deer feeds, grains, hay, and supplemental  
275 items, including peanuts, roasted soybeans, and dandelions. As diets differed between farmed  
276 and free-ranging deer, it was not surprising that farmed and free-ranging deer had significantly  
277 different microbial communities or that there were significant differences in gut microbiota  
278 between the two farms with different feeding regimens. Multiple previous studies have also  
279 reported gut microbial differences between wild and captive animals<sup>48-50</sup>, including  
280 ruminants<sup>33,51</sup>.

281

282 Spatial proximity (or social interaction) has also been shown to influence the gut microbiota in  
283 other species: individuals with more contact share more similar gut microbiota<sup>52</sup>. Farmed deer  
284 sharing the same pen are likely to have increased direct and indirect contact with each other  
285 while free-ranging deer within the same herd (typically matrilineal family groups or bachelor  
286 herds) will also have more contact with each other than with non-herdmates. Host genetics can  
287 also play a role in shaping the gut microbiome<sup>53</sup>; although, these effects are subtle compared to

288 other environmental factors<sup>54</sup>, and one previous study on white-tailed deer, albeit small (n=66),  
289 did not find any significant effects of host genetic relatedness on the gut microbiota<sup>46</sup>. Both  
290 farms in this study were breeding facilities and maintained a number of genetically related  
291 animals. During breeding season, a single male was commonly penned with 10-12 females for  
292 breeding. Breeders that produced high quality traits might be maintained at the farm for multiple  
293 seasons, generating several years of related offspring. Biogeography – including factors like  
294 habitat or soil type and water source – could also uniquely influence the gut microbiota of deer at  
295 each location<sup>55</sup>.

296

297 We hypothesized that deer gut microbial communities would differ by provenance. Specifically,  
298 we predicted that based on differing diets, host genetics, and biogeography, we would observe  
299 distinct microbial signatures in deer from each location (Farm 1, Farm 2, Free-ranging) (**Fig. 1a**).  
300 We further predicted that within locations, farmed deer would have more similar (less distant)  
301 microbiota due to more regulated diets and more limited “home ranges” as compared to free-  
302 ranging deer (**Fig 1c**, Farm 1 to Farm 1, Farm 2 to Farm 2, Free-ranging to Free-ranging).  
303 Finally, we hypothesized that the greatest differences in microbial communities would be  
304 observed between farmed and free-ranging deer since farmed deer generally share more similar  
305 diets (formulated commercial feeds, grains, hay, pasture) than free-ranging deer (**Fig. 1c**, Farm 1  
306 to Farm 2, Farm 1 to Free-ranging, Farm 2 to Free-ranging). Our results supported each of these  
307 predictions. Although we cannot parse the individual effects of diet, spatial proximity, host  
308 genetics, and biogeography in this data set, the differentially abundant taxa identified between  
309 farmed and free-ranging deer strongly support a role for diet as a key driver of the microbial  
310 community differences we observed. Free-ranging deer consume a plant and fiber-rich diet full  
311 of shrubs and browse, while farmed deer consume a starchier diet of grains and commercial feed  
312 in addition to pasture and hay. Microbial taxa in the *Lachnospiraceae* and *Ruminococcaceae*  
313 families were increased in abundance in the free-ranging deer, while Bacteroidales taxa, like  
314 *Prevotellaceae*, were increased in the farmed deer (**Supp. Table 1**). *Lachnospiraceae* and  
315 *Ruminococcaceae* taxa are associated with plant-rich diets, and these taxa metabolize plant  
316 materials such as cellulose and hemicellulose<sup>50,56,57</sup>. Bacteroidales and *Prevotellaceae* are more  
317 commonly associated with starch consumption, and in ruminants, Bacteroidales, including  
318 *Prevotella*, increase in animals on concentrate / grain diets<sup>50,58–60</sup>.

319

320 Firmicutes:Bacteroidetes ratios also indicated diet as a driver of differing microbial compositions  
321 between farmed and free-ranging deer. Free-ranging deer exhibited higher F:B ratios, which are  
322 associated with increased energy extraction<sup>42</sup> and fermentation efficiency. In humans, increased  
323 F:B ratios are associated with obesity; in farmed ruminants, increased F:B ratios are positively  
324 correlated with average daily gain<sup>42,43</sup>. In foregut-fermenting primates (which have ruminant-  
325 like digestion), wild primates exhibited higher F:B ratios than captive primates<sup>44</sup>. This was  
326 attributed to the need for the wild primates to maximize energy extraction from “low-quality”  
327 food items such as fibrous plants, bark, and seeds, while captive primates, with “high quality”  
328 diets rich in soluble carbohydrates, were less dependent on efficient energy harvest<sup>44</sup>. Similarly,  
329 free-ranging deer gut microbiota may maximize energy extraction from a fibrous browse diet,  
330 while the grain-rich diets of farmed deer reduce the need for fermentation efficiency and create a  
331 niche for microbial taxa capable of metabolizing soluble starches and sugars. Taken together, our  
332 results suggest that diet is playing a key role in the microbial differences we observe by  
333 provenance.

334

### 335 *Microbial community structure by sex*

336 Interestingly, we also identified microbial composition differences by sex on Farm 1 and in free-  
337 ranging deer. This analysis only included CWD non-detect farmed deer. No differences in  
338 microbial composition by sex were observed on Farm 2; however, Farm 2 had the smallest  
339 sample size (n=18 males, 12 females) which may have limited our power to detect these  
340 differences. Microbial community structure alterations associated with sex could be attributed to  
341 a number of factors, including differential feeding by sex or hormonal influences on the gut  
342 microbiome. We received anecdotal reports of differential feeding by sex on Farm 1 based on  
343 deer breeding and growth requirements. While we did not characterize the diet of free-ranging  
344 deer by sex in this study, a previous study on wild sheep reported differential feeding between  
345 males and females, leading to differences in gut microbiota composition between the sexes<sup>61</sup>. A  
346 separate study on white-tailed deer reported that, in winter, female deer in the Midwest  
347 consumed more grass (higher quality feed) and less browse than male deer<sup>62</sup>. Our samples were  
348 also collected from free-ranging deer in the Midwest during winter; thus, differential feeding  
349 could contribute to the microbial differences we observed between sexes. Male and female deer

350 also maintain different home ranges<sup>63</sup>, which can differ in vegetation – further driving potential  
351 dietary differences by sex.

352

353 Besides diet, breeding hormones have been linked to gut microbial changes in wild animals,  
354 including ground squirrels (*Spermophilus dauricus*)<sup>64</sup> and black rhino (*Diceros bicornis*)<sup>65</sup>. It is  
355 thus possible that hormones are influencing gut microbiota in male and female white-tailed deer.  
356 Free-ranging deer were sampled January through March which corresponds to estrous cycling or  
357 pregnancy in females and post-rut (declining testosterone levels) in males<sup>66</sup>. Notably, our results  
358 contrast with a 2017 study on white-tailed deer that observed no differences in microbial  
359 composition between sexes; although, sampling season differed between our studies, as the 2017  
360 study sampled deer in March and June<sup>46</sup>.

361

362 Differentially abundant taxa between male and female deer included a microbe in the order  
363 Bacteroidales, family RF16 - increased in males on Farm 1; and microbes in the genera GCA-  
364 900066575 (family *Lachnospiraceae*) and *Oscillibacter* - both increased in free-ranging males.  
365 Bacteroidales and *Lachnospiraceae* taxa, discussed above, have ties to diet and energy  
366 extraction. *Oscillibacter* species increase in humans on diets high in resistant starch and low in  
367 carbohydrates<sup>67</sup>, which is consistent with the browse-rich winter diet of free-ranging male deer  
368<sup>62</sup>. These differentially abundant taxa underscore the role of diet in microbial community  
369 differences observed by sex.

370

### 371 *Chronic wasting disease and the gut microbiota*

372 On both farms, we observed significant differences in microbial composition in CWD-positive  
373 deer as compared to non-detect deer. Twenty-five of the 26 total CWD-positive deer across both  
374 farms were male. Previous studies in wild deer have reported that CWD prevalence is two times  
375 higher in males, and that males have a threefold greater risk of CWD infection as compared to  
376 females<sup>68</sup>. These differences in infection risk and prevalence by sex are thought to be linked to  
377 increased CWD transmission amongst male social groups outside of breeding season<sup>68</sup>.

378 Alternately, models of CWD outbreaks in captive deer predict that density-dependence and  
379 indirect transmission<sup>69</sup> play an important role in CWD spread. On at least one of the farms in  
380 this study (Farm 1), male deer were penned with females during rut (fall) and then separated into

381 bachelor herds for the remainder of the year. As such, both transmission through male social  
382 groups and indirect, density-dependent transmission (in bachelor pens) could have played a role  
383 in the predominantly male infections observed in farmed deer. Because of this skew by sex, we  
384 opted to analyze only males in relation to CWD status. This within-farm, male-only analysis  
385 mitigated potential gut microbial confounders, including sex, diet, and biogeography.

386

387 Differentially abundant microbial taxa common across both farms and increased in CWD-  
388 positive animals included: two different microbes in the class Bacilli, order RF39 (formerly  
389 Mollicutes RF39) – one increased on Farm 1 and one increased on Farm 2; a microbe in the  
390 family *Lachnospiraceae* UCG-10; and two different ASVs in the *Akkermansia* family – one  
391 increased on Farm 1, and one increased on Farm 2 (**Fig. 3**). The fact that these three taxa (RF39,  
392 *Lachnospiraceae* UCG-10, *Akkermansia*) emerged as CWD-associated on two independently run  
393 farms over 100 miles apart is intriguing and merits further attention. In a previous study, RF39  
394 was found to be increased in a mouse model of the relapse-remitting form of multiple sclerosis  
395 (MS) <sup>70</sup>, which is a disease that shares many features with prion diseases, including CJD <sup>71</sup>. Taxa  
396 in the Bacilli (formerly Mollicutes) class have been associated with CWD in other studies <sup>72</sup>.  
397 Specifically, Bastian et al. reported the presence of *Spiroplasma* DNA in the brains of eight out  
398 of ten sheep with scrapie, six out of seven cervids with CWD, and two humans with CJD <sup>72</sup>. All  
399 matched normal sheep, cervid, and human brains were negative for *Spiroplasma* DNA. However,  
400 no *Spiroplasma* could be detected in a hamster model of scrapie <sup>73</sup>. Further, Bastian et al.  
401 induced spongiform changes in the brains of deer, sheep, and goats inoculated intracranially with  
402 *Spiroplasma* species <sup>74</sup>. This could not be replicated in a subsequent study on neonatal goats <sup>75</sup>;  
403 although, differences in methodology between the studies was noted. *Spiroplasma* species are  
404 not in the order RF39.

405

406 Besides RF39, we also observed an increase in *Lachnospiraceae* UCG-010 in CWD-positive  
407 animals on both farms at the L7 level (**Fig. 3b, c**). *Lachnospiraceae* taxa have been reported in  
408 other studies on wild and captive deer gut microbiota <sup>76,77</sup>. *Lachnospiraceae* has also been noted  
409 in association with neurologic diseases. However, it is decreased, rather than increased, in  
410 several studies on Parkinson's disease (PD), and this decreased abundance is associated with  
411 more severe cognitive and motor impairments <sup>78,79</sup>. Decreases in *Lachnospiraceae* have also

412 been observed in Alzheimer’s Disease (AD) and amyotrophic lateral sclerosis (ALS) <sup>28,80</sup>.  
413 Moreover, multiple studies highlight the ability of Lachnospiraceae species to produce butyrate  
414 which helps maintain the epithelial barrier <sup>81,82</sup>. However, *Lachnospiraceae* family taxa have  
415 also been associated with type 2 diabetes <sup>82</sup> and intestinal inflammation<sup>83</sup>.  
416  
417 Like *Lachnospiraceae*, *Akkermansia* taxa are commonly associated with health<sup>84</sup> and even touted  
418 as promising probiotics <sup>84,85</sup>; although, more recent evidence has promoted caution in defining  
419 *Akkermansia* as exclusively a “good bug” <sup>86</sup>. In fact, the mucin-degrading *Akkermansia* is  
420 reportedly increased in multiple neurologic diseases, including PD, multiple sclerosis, and AD  
421 <sup>32,87–90</sup>, although it has also been shown to reduce pathological alterations (amyloid beta-protein  
422 accumulation) and cognitive impairments in one mouse model of AD <sup>91</sup>. *Akkermansia* has  
423 additionally been associated with fasting or malnutrition, as it can utilize host mucin as its sole  
424 energy source while other microbes require dietary substrates consumed by the host <sup>50,92</sup>. A  
425 single *Akkermansia* ASV was significantly increased on Farm 1, while a different *Akkermansia*  
426 ASV was increased on Farm 2 (**Fig. 3a,b,g,h**), suggesting potential species or strain differences  
427 in these taxa by Farm. Future work with deeper sequencing is necessary to assess true species  
428 and strain level differences between farms.  
429  
430 We hypothesized that we would observe differences in gut microbial communities by CWD  
431 status, and our results support this hypothesis. However, how and why these three taxa (RF39,  
432 *Lachnospiraceae* UCG-010, *Akkermansia*) are associated with CWD are the next important  
433 questions to answer. Do these taxa contribute to a gut environment that is more permissive to  
434 orally-ingested prions? *Akkermansia*, for example, can degrade mucin, thinning the protective  
435 mucus barrier that lines the gut. In concert with a pro-inflammatory *Lachnospiraceae* species,  
436 these microbes could create an inflammatory environment that induces colonic M-cells <sup>11,14,15,93</sup>,  
437 enhancing susceptibility to prion disease <sup>6,94</sup>. Gut inflammation has also been linked to the  
438 progression of neurodegenerative disease including AD and PD <sup>30–32</sup>. Alternately, are these taxa  
439 increased as a result of prion disease? Early clinical signs of CWD can include behavioral and  
440 locomotive changes followed by eventual wasting and weight loss<sup>1</sup>. Subtle behavioral changes  
441 could conceivably alter diet and drive dietary differences in the gut microbiota between deer with  
442 and without CWD. *Akkermansia* can also thrive in the face of malnutrition as it only needs host

443 mucin to survive; therefore, *Akkermansia* could increase in a host that is consuming less food.  
444 Finally, could these taxa be providing protective effects in the presence of a prion disease? This  
445 seems less likely from an evolutionary perspective, but *Lachnospiraceae* and *Akkermansia* are  
446 associated with many health benefits, and increased relative abundances of these species are  
447 associated with protection against metabolic diseases and reduced pathological changes in AD  
448 <sup>28,82,86,91,95</sup>. Bacilli (e.g. RF39 - formerly in phylum Tenericutes, now in Firmicutes) have also  
449 been posited to play a protective role in the gut as they are decreased in relative abundance in the  
450 presence of DSS-colitis <sup>96</sup>. It is important to note that all three taxa were also observed in the  
451 free-ranging deer at varying and often comparable levels to the levels observed in CWD-positive  
452 farmed deer (**Fig. 3**). Given the significant differences in microbial composition and diversity  
453 between farmed and free-ranging deer, these results are more challenging to interpret but suggest  
454 that, while the differentially abundant taxa in CWD-positive animals may play a role in CWD  
455 pathogenesis, these results need to be interpreted carefully and within context.

456  
457 This study represents the first investigation, to our knowledge, of white-tailed deer gut  
458 microbiota in relation to CWD. We acknowledge several limitations to the present study. First,  
459 while our results suggest that differential diets are the major driver of microbial community  
460 differences by provenance and sex, we cannot explicitly rule out the potential effects of spatial  
461 proximity, host genetics, or biogeography. Second, as farmed and free-ranging deer had  
462 significantly different microbial communities, we cannot be certain that microbial composition  
463 differences observed in farmed deer based on CWD-status are generalizable to free-ranging deer.  
464 Third, the free-ranging deer in this study were not explicitly tested for CWD but were presumed  
465 CWD non-detect based on extensive CWD testing on Cleveland Metroparks deer herds in years  
466 antecedent and subsequent to 2018. Further, until December 2020, CWD had never been  
467 detected in any free-ranging deer in the state of Ohio. Fourth, microbial composition is not  
468 representative of microbial function <sup>97</sup>, and future studies using shotgun metagenomics and  
469 metabolomics are warranted to capture function. Fifth, while *Akkermansia*, RF39, and  
470 *Lachnospiraceae* UCG-010 are associated with CWD, further work is needed to clarify if these  
471 differences preceded or succeeded disease. Finally, fecal samples from Farm 1 and free-ranging  
472 deer underwent library preparation and sequencing on an Illumina MiSeq at The Ohio State  
473 University Molecular and Cellular Imaging Center, while fecal samples from Farm 2 underwent



474 library preparation and sequencing on an Illumina MiSeq at Argonne National Laboratory. While  
475 differences between laboratories and sequencing facilities can lead to differing results in  
476 microbiome studies<sup>98</sup>, we limited these effects by using the same methodology and kits (Qiagen  
477 PowerFecal) for all DNA extractions, the same region and primers for sequencing (V4 -515F and  
478 806R), and all sequencing data was combined and underwent sequence processing and taxonomy  
479 assignment together. Further, our results by sex and CWD status would not be affected, as these  
480 results were analyzed independently for each location (Farm 1, Farm 2, Free-ranging).

481  
482 In conclusion, we report differences in gut microbiota in white-tailed deer by provenance (Farm  
483 1, Farm 2, Free-ranging), sex, and CWD status. Differences by provenance and sex are likely  
484 driven by diet, while differences by CWD status are more challenging to interpret and include  
485 increased abundances of *Akkermansia*, *Lachnospireacea* UCG-010, and RF39 taxa in CWD-  
486 positive deer. Priorities for future research include determining how these taxa play a role in CWD  
487 susceptibility or pathogenesis, characterizing the gut microbiota of free-ranging cervids with  
488 CWD, and assessing M-cell presence and abundance in CWD-positive and CWD non-detect  
489 animals to elucidate potential relationships between gut microbiota, M-cells, and chronic wasting  
490 disease.

#### 491 492 **Author Contributions**

493 DM collected the samples from the farmed deer, performed DNA extraction on all samples,  
494 assisted with data analysis of sequencing results using QIIME 2, and drafted the manuscript.  
495 CM assisted with DNA extraction of all samples, DNA purification of Farm 1 samples,  
496 coordinated laboratory activities, and assisted with editing of the manuscript.  
497 ME assisted with data analysis and processing of sequencing results using QIIME 2 and provided  
498 feedback on the manuscript.  
499 GB provided expertise on neuropathology in cervids and feedback on the manuscript.  
500 DB and KP facilitated CWD testing and sample collection from farmed deer, provided expertise  
501 on CWD in cervids, and provided feedback on the manuscript.  
502 PD facilitated sample collection from free-ranging deer and provided feedback on the  
503 manuscript.

504 VLH conceived the presented idea and designed and directed the study. Additionally, VLH  
505 assisted with analysis of sequencing results, manuscript preparation, and figure generation.

506

### 507 **Acknowledgements**

508 We acknowledge the many individuals at WVDL, USDA, Cleveland Metroparks, and the  
509 veterinary students at the University of Wisconsin for assistance with sample collection from  
510 farmed and free-ranging deer. We further acknowledge the Ohio State University Infectious  
511 Diseases Institute, Department of Veterinary Preventive Medicine, and the Cliff M. Monahan  
512 Summer Research Fellowship for their support of this project.

513

### 514 **Conflicts of Interest**

515 No authors report any conflicts of interest.

516

### 517 **References**

- 518 1. Haley, N. J. & Hoover, E. A. Chronic wasting disease of cervids: current knowledge and  
519 future perspectives. *Annual Review of Animal Biosciences* **3**, 305–325 (2015).
- 520 2. Hannaoui, S., Schatzl, H. M. & Gilch, S. Chronic wasting disease: emerging prions and  
521 their potential risk. *PLOS Pathogens* **13**, e1006619 (2017).
- 522 3. United States Geological Survey. Expanding distribution of chronic wasting disease.  
523 *Expanding Distribution of Chronic Wasting Disease*  
524 [https://www.usgs.gov/centers/nwhc/science/expanding-distribution-chronic-wasting-](https://www.usgs.gov/centers/nwhc/science/expanding-distribution-chronic-wasting-disease?qt-science_center_objects=0#qt-science_center_objects)  
525 [disease?qt-science\\_center\\_objects=0#qt-science\\_center\\_objects](https://www.usgs.gov/centers/nwhc/science/expanding-distribution-chronic-wasting-disease?qt-science_center_objects=0#qt-science_center_objects).
- 526 4. Benestad, S. L., Mitchell, G., Simmons, M., Ytrehus, B. & Vikøren, T. First case of chronic  
527 wasting disease in Europe in a Norwegian free-ranging reindeer. *Veterinary Research* **47**,  
528 (2016).
- 529 5. Gough, K. C. & Maddison, B. C. Prion transmission: prion excretion and occurrence in the  
530 environment. *Prion* **4**, 275–282 (2010).

- 531 6. Donaldson, D. S., Sehgal, A., Rios, D., Williams, I. R. & Mabbott, N. A. Increased  
532 abundance of m cells in the gut epithelium dramatically enhances oral prion disease  
533 susceptibility. *PLOS Pathogens* **12**, e1006075 (2016).
- 534 7. Press, C. M., Heggebø, R. & Espenes, A. Involvement of gut-associated lymphoid tissue of  
535 ruminants in the spread of transmissible spongiform encephalopathies. *Adv. Drug Deliv.*  
536 *Rev.* **56**, 885–899 (2004).
- 537 8. Corr, S. C., Gahan, C. C. G. M. & Hill, C. M-cells: origin, morphology and role in mucosal  
538 immunity and microbial pathogenesis. *FEMS Immunology & Medical Microbiology* **52**, 2–  
539 12 (2008).
- 540 9. Mabbott, N. A., Donaldson, D. S., Ohno, H., Williams, I. R. & Mahajan, A. Microfold (M)  
541 cells: important immunosurveillance posts in the intestinal epithelium. *Mucosal*  
542 *Immunology* **6**, 666–677 (2013).
- 543 10. Maignien, T., Lasmézas, C. I., Beringue, V., Dormont, D. & Deslys, J. P. Pathogenesis of  
544 the oral route of infection of mice with scrapie and bovine spongiform encephalopathy  
545 agents. *J. Gen. Virol.* **80** ( Pt 11), 3035–3042 (1999).
- 546 11. Bennett, K. M. *et al.* Induction of colonic m cells during intestinal inflammation. *The*  
547 *American Journal of Pathology* **186**, 1166–1179 (2016).
- 548 12. Donaldson, D. S. & Mabbott, N. A. The influence of the commensal and pathogenic gut  
549 microbiota on prion disease pathogenesis. *Journal of General Virology* **97**, 1725–1738  
550 (2016).
- 551 13. Terahara, K. *et al.* Comprehensive gene expression profiling of peyer’s patch m cells,  
552 villous m-like cells, and intestinal epithelial cells. *The Journal of Immunology* **180**, 7840–  
553 7846 (2008).

- 554 14. Sigurdson CJ *et al.* Bacterial colitis increases susceptibility to oral prion disease. *The*  
555 *Journal of infectious diseases* **199**, 243–52 (2009).
- 556 15. Tahoun, A. *et al.* Salmonella transforms follicle-associated epithelial cells into m cells to  
557 promote intestinal invasion. *Cell Host & Microbe* **12**, 645–656 (2012).
- 558 16. Kamada, N., Chen, G. Y., Inohara, N. & Núñez, G. Control of pathogens and pathobionts  
559 by the gut microbiota. *Nature Immunology* **14**, 685–690 (2013).
- 560 17. Round, J. L. & Mazmanian, S. K. The gut microbiota shapes intestinal immune responses  
561 during health and disease. *Nature Reviews Immunology* **9**, 313–323 (2009).
- 562 18. Ogbonnaya, E. S. *et al.* Adult hippocampal neurogenesis is regulated by the microbiome.  
563 *Biol Psychiatry* **78**, e7-9 (2015).
- 564 19. Diaz Heijtz, R. *et al.* Normal gut microbiota modulates brain development and behavior.  
565 *Proc Natl Acad Sci U S A* **108**, 3047–3052 (2011).
- 566 20. Erny, D. *et al.* Host microbiota constantly control maturation and function of microglia in  
567 the CNS. *Nature Neuroscience* **18**, 965–977 (2015).
- 568 21. Fung, T. C., Olson, C. A. & Hsiao, E. Y. Interactions between the microbiota, immune and  
569 nervous systems in health and disease. *Nat Neurosci* **20**, 145–155 (2017).
- 570 22. Chu, Y. & Kordower, J. H. The prion hypothesis of Parkinson’s disease. *Curr Neurol*  
571 *Neurosci Rep* **15**, 28 (2015).
- 572 23. Goedert, M. Alzheimer’s and Parkinson’s diseases: the prion concept in relation to  
573 assembled A $\beta$ , tau, and  $\alpha$ -synuclein. *Science* **349**, 1255555 (2015).
- 574 24. Herva, M. E. & Spillantini, M. G. Parkinson’s disease as a member of prion-like disorders.  
575 *Virus Res.* **207**, 38–46 (2015).

- 576 25. Tan, J. M. M., Wong, E. S. P. & Lim, K.-L. Protein misfolding and aggregation in  
577 Parkinson's disease. *Antioxid. Redox Signal.* **11**, 2119–2134 (2009).
- 578 26. Weickenmeier, J., Jucker, M., Goriely, A. & Kuhl, E. A physics-based model explains the  
579 prion-like features of neurodegeneration in Alzheimer's disease, Parkinson's disease, and  
580 amyotrophic lateral sclerosis. *Journal of the Mechanics and Physics of Solids* **124**, 264–281  
581 (2019).
- 582 27. Olanow, C. W. & Brundin, P. Parkinson's disease and alpha synuclein: is Parkinson's  
583 disease a prion-like disorder? *Mov. Disord.* **28**, 31–40 (2013).
- 584 28. D'Argenio, V. & Sarnataro, D. Microbiome influence in the pathogenesis of prion and  
585 Alzheimer's diseases. *Int J Mol Sci* **20**, (2019).
- 586 29. Kang, D.-W. *et al.* Microbiota transfer therapy alters gut ecosystem and improves  
587 gastrointestinal and autism symptoms: an open-label study. *Microbiome* **5**, 10 (2017).
- 588 30. Rowin, J., Xia, Y., Jung, B. & Sun, J. Gut inflammation and dysbiosis in human motor  
589 neuron disease. *Physiol Rep* **5**, (2017).
- 590 31. Sampson, T. R. *et al.* Gut microbiota regulate motor deficits and neuroinflammation in a  
591 model of Parkinson's disease. *Cell* **167**, 1469-1480.e12 (2016).
- 592 32. Vogt, N. M. *et al.* Gut microbiome alterations in Alzheimer's disease. *Sci Rep* **7**, 13537  
593 (2017).
- 594 33. Guan, Y. *et al.* Comparison of the gut microbiota composition between wild and captive  
595 sika deer (*Cervus nippon hortulorum*) from feces by high-throughput sequencing. *AMB*  
596 *Express* **7**, 212 (2017).

- 597 34. USDA APHIS | Cervids: Chronic Wasting Disease.  
598 <https://www.aphis.usda.gov/aphis/ourfocus/animalhealth/animal-disease->  
599 [information/cervid/cervids-cwd/cervid-cwd](https://www.aphis.usda.gov/aphis/ourfocus/animalhealth/animal-disease-information/cervid/cervids-cwd/cervid-cwd) (2020).
- 600 35. Keane, D. P. *et al.* Chronic wasting disease in a Wisconsin white-tailed deer farm. *Journal*  
601 *of Veterinary Diagnostic Investigation* **20**, 698–703 (2008).
- 602 36. Ethanol precipitation protocol - MRC Holland Technical Support.  
603 <https://support.mrcholland.com/kb/articles/ethanol-precipitation-protocol>.
- 604 37. Apprill, A. & Parada, A. E. 16S Illumina amplicon protocol: Earth microbiome project.  
605 <http://press.igsb.anl.gov/earthmicrobiome/protocols-and-standards/16s/>.
- 606 38. Boylen, E. *et al.* Reproducible, interactive, scalable and extensible microbiome data science  
607 using QIIME 2. *Nature Biotechnology* **37**, 852–857 (2019).
- 608 39. Yilmaz, P. *et al.* The SILVA and ‘all-species Living Tree Project (LTP)’ taxonomic  
609 frameworks. *Nucleic Acids Research* (2014) doi:10.1093/nar/gkt1209.
- 610 40. Quast, C. *et al.* The SILVA ribosomal RNA gene database project: Improved data  
611 processing and web-based tools. *Nucleic Acids Research* (2013) doi:10.1093/nar/gks1219.
- 612 41. Callahan, B. J. *et al.* DADA2: high resolution sample inference from Illumina amplicon  
613 data. *Nat Methods* **13**, 581–583 (2016).
- 614 42. Turnbaugh, P. J. *et al.* An obesity-associated gut microbiome with increased capacity for  
615 energy harvest. *Nature* **444**, 1027–1031 (2006).
- 616 43. Min, B. R., Gurung, N., Shange, R. & Solaiman, S. Potential role of rumen microbiota in  
617 altering average daily gain and feed efficiency in meat goats fed simple and mixed pastures  
618 using bacterial tag-encoded FLX amplicon pyrosequencing. *J Anim Sci* **97**, 3523–3534  
619 (2019).

- 620 44. Clayton, J. B. *et al.* Associations between nutrition, gut microbiome, and health in a novel  
621 nonhuman primate model. *Scientific Reports* **8**, 11159 (2018).
- 622 45. David, L. A. *et al.* Diet rapidly and reproducibly alters the human gut microbiome. *Nature*  
623 **505**, 559–563 (2014).
- 624 46. Delgado, M. L. *et al.* Intestinal microbial community dynamics of white-tailed deer  
625 (*Odocoileus virginianus*) in an agroecosystem. *Microbial Ecology* **74**, 496–506 (2017).
- 626 47. Rogers, L. L., Mooty, J. J. & Dawson, D. *Foods of white-tailed deer in the upper Great*  
627 *Lakes region: a review*. (North Central Forest Experiment Station, Forest Service, U.S.  
628 Dept. of Agriculture, 1981).
- 629 48. Gibson, K. M. *et al.* Gut microbiome differences between wild and captive black rhinoceros  
630 – implications for rhino health. *Scientific Reports* **9**, 7570 (2019).
- 631 49. Guo, W. *et al.* Comparative study of gut microbiota in wild and captive giant pandas  
632 (*Ailuropoda melanoleuca*). *Genes (Basel)* **10**, (2019).
- 633 50. Hale, V. L. *et al.* Gut microbiota in wild and captive Guizhou snub-nosed monkeys,  
634 *Rhinopithecus brelichi*. *American Journal of Primatology* **81**, e22989 (2019).
- 635 51. Prabhu, V. R., Wasimuddin, Kamalakkannan, R., Arjun, M. S. & Nagarajan, M.  
636 Consequences of domestication on gut microbiome: a comparative study between wild gaur  
637 and domestic mithun. *Front. Microbiol.* **11**, (2020).
- 638 52. Moeller, A. H. *et al.* Social behavior shapes the chimpanzee pan-microbiome. *Science*  
639 *Advances* **2**, e1500997 (2016).
- 640 53. Goodrich, J. K. *et al.* Human genetics shape the gut microbiome. *Cell* **159**, 789–799 (2014).
- 641 54. Rothschild, D. *et al.* Environment dominates over host genetics in shaping human gut  
642 microbiota. *Nature* **555**, 210–215 (2018).

- 643 55. Loo, W. T., García-Loor, J., Dudaniec, R. Y., Kleindorfer, S. & Cavanaugh, C. M. Host  
644 phylogeny, diet, and habitat differentiate the gut microbiomes of Darwin's finches on Santa  
645 Cruz Island. *Scientific Reports* **9**, 18781 (2019).
- 646 56. Amato, K. R. *et al.* The gut microbiota appears to compensate for seasonal diet variation in  
647 the wild black howler monkey (*Alouatta pigra*). *Microb Ecol* **69**, 434–443 (2015).
- 648 57. Clayton, J. B. *et al.* The gut microbiome of nonhuman primates: lessons in ecology and  
649 evolution. *Am J Primatol* **80**, e22867 (2018).
- 650 58. Khafipour, E. *et al.* Effects of grain feeding on microbiota in the digestive tract of cattle.  
651 *Anim Fron* **6**, 13–19 (2016).
- 652 59. Liu, C. *et al.* Dynamic alterations in yak rumen bacteria community and metabolome  
653 characteristics in response to feed type. *Front. Microbiol.* **10**, (2019).
- 654 60. Wu, G. D. *et al.* Linking long-term dietary patterns with gut microbial enterotypes. *Science*  
655 **334**, 105–108 (2011).
- 656 61. Zhu, Z. *et al.* Seasonal variation and sexual dimorphism of the microbiota in wild blue  
657 sheep (*Pseudois nayaur*). *Frontiers in Microbiology* **11**, (2020).
- 658 62. Beier, P. Sex differences in quality of white-tailed deer diets. *Journal of Mammalogy* **68**,  
659 323–329 (1987).
- 660 63. Dechen Quinn, A. C., Williams, D. M. & Porter, W. F. Landscape structure influences  
661 space use by white-tailed deer. *J Mammal* **94**, 398–407 (2013).
- 662 64. Yang, X. *et al.* Seasonal breeding leads to changes for gut microbiota diversity in the wild  
663 ground squirrel (*Spermophilus dauricus*). [https://www.researchsquare.com/article/rs-](https://www.researchsquare.com/article/rs-96089/v1)  
664 96089/v1 (2020) doi:10.21203/rs.3.rs-96089/v1.



- 665 65. Antwis, R. E., Edwards, K. L., Unwin, B., Walker, S. L. & Shultz, S. Rare gut microbiota  
666 associated with breeding success, hormone metabolites and ovarian cycle phase in the  
667 critically endangered eastern black rhino. *Microbiome* **7**, 27 (2019).
- 668 66. Gordon, I. R. *Controlled Reproduction in Horses, Deer, and Camelids*. (Cab International,  
669 1997).
- 670 67. Walker, A. W. *et al.* Dominant and diet-responsive groups of bacteria within the human  
671 colonic microbiota. *The ISME Journal* **5**, 220–230 (2011).
- 672 68. Samuel, M. D. & Storm, D. J. Chronic wasting disease in white-tailed deer: infection,  
673 mortality, and implications for heterogeneous transmission. *Ecology* **97**, 3195–3205 (2016).
- 674 69. Miller, M. W., Hobbs, N. T. & Tavener, S. J. Dynamics of prion disease transmission in  
675 mule deer. *Ecological Applications* **16**, 2208–2214 (2006).
- 676 70. Gandy, K. A. O., Zhang, J., Nagarkatti, P. & Nagarkatti, M. The role of gut microbiota in  
677 shaping the relapse-remitting and chronic-progressive forms of multiple sclerosis in mouse  
678 models. *Scientific Reports* **9**, (2019).
- 679 71. Ebringer, A., Rashid, T., Wilson, C., Boden, R. & Thompson, E. A possible link between  
680 multiple sclerosis and Creutzfeldt–Jakob disease based on clinical, genetic, pathological  
681 and immunological evidence involving *Acinetobacter* bacteria. *Medical Hypotheses* **64**,  
682 487–494 (2005).
- 683 72. Bastian, F. O., Dash, S. & Garry, R. F. Linking chronic wasting disease to scrapie by  
684 comparison of *Spiroplasma mirum* ribosomal DNA sequences. *Experimental and*  
685 *Molecular Pathology* **77**, 49–56 (2004).
- 686 73. Alexeeva, I. *et al.* Absence of *Spiroplasma* or other bacterial 16S rRNA genes in brain  
687 tissue of hamsters with Scrapie. *Journal of Clinical Microbiology* **44**, 91–97 (2006).

- 688 74. Bastian, F. O. *et al.* Spiroplasma spp. from transmissible spongiform encephalopathy brains  
689 or ticks induce spongiform encephalopathy in ruminants. *J Med Microbiol* **56**, 1235–1242  
690 (2007).
- 691 75. French, H. M. Characterization of Spiroplasma mirum and its role in transmissible  
692 spongiform encephalopathies.
- 693 76. Ricci, S. *et al.* Impact of supplemental winter feeding on ruminal microbiota of roe deer  
694 Capreolus capreolus. *wbio* **2019**, 1–11 (2019).
- 695 77. Sun, C.-H., Liu, H.-Y., Liu, B., Yuan, B.-D. & Lu, C.-H. Analysis of the gut microbiome of  
696 wild and captive Père David’s deer. *Front Microbiol* **10**, (2019).
- 697 78. Barichella, M. *et al.* Unraveling gut microbiota in Parkinson’s disease and atypical  
698 parkinsonism. *Movement Disorders* **34**, 396–405 (2019).
- 699 79. Pietrucci, D. *et al.* Dysbiosis of gut microbiota in a selected population of Parkinson’s  
700 patients. *Parkinsonism & Related Disorders* **65**, 124–130 (2019).
- 701 80. Radisavljevic, N., Cirstea, M. & Brett Finlay, B. Bottoms up: the role of gut microbiota in  
702 brain health. *Environ Microbiol* (2018) doi:10.1111/1462-2920.14506.
- 703 81. Geirnaert, A. *et al.* Butyrate-producing bacteria supplemented in vitro to Crohn’s disease  
704 patient microbiota increased butyrate production and enhanced intestinal epithelial barrier  
705 integrity. *Scientific Reports* **7**, 11450 (2017).
- 706 82. Vacca, M. *et al.* The controversial role of human gut Lachnospiraceae. *Microorganisms* **8**,  
707 (2020).
- 708 83. Zeng, H., Ishaq, S. L., Zhao, F.-Q. & Wright, A.-D. G. Colonic inflammation accompanies  
709 an increase of  $\beta$ -catenin signaling and Lachnospiraceae/Streptococcaceae bacteria in the

- 710 hind gut of high-fat diet-fed mice. *The Journal of Nutritional Biochemistry* **35**, 30–36  
711 (2016).
- 712 84. Zhang, T., Li, Q., Cheng, L., Buch, H. & Zhang, F. Akkermansia muciniphila is a  
713 promising probiotic. *Microb Biotechnol* **12**, 1109–1125 (2019).
- 714 85. Zhou, K. Strategies to promote abundance of Akkermansia muciniphila, an emerging  
715 probiotics in the gut, evidence from dietary intervention studies. *J Funct Foods* **33**, 194–  
716 201 (2017).
- 717 86. Cirstea, M., Radisavljevic, N. & Finlay, B. B. Good bug, bad bug: breaking through  
718 microbial stereotypes. *Cell Host Microbe* **23**, 10–13 (2018).
- 719 87. Berer, K. *et al.* Gut microbiota from multiple sclerosis patients enables spontaneous  
720 autoimmune encephalomyelitis in mice. *PNAS* **114**, 10719–10724 (2017).
- 721 88. Cekanaviciute, E. *et al.* Gut bacteria from multiple sclerosis patients modulate human T  
722 cells and exacerbate symptoms in mouse models. *PNAS* **114**, 10713–10718 (2017).
- 723 89. Heintz-Buschart, A. *et al.* The nasal and gut microbiome in Parkinson’s disease and  
724 idiopathic rapid eye movement sleep behavior disorder. *Mov Disord* **33**, 88–98 (2018).
- 725 90. Hill-Burns, E. M. *et al.* Parkinson’s disease and PD medications have distinct signatures of  
726 the gut microbiome. *Mov Disord* **32**, 739–749 (2017).
- 727 91. Ou, Z. *et al.* Protective effects of Akkermansia muciniphila on cognitive deficits and  
728 amyloid pathology in a mouse model of Alzheimer’s disease. *Nutrition & Diabetes* **10**, 1–  
729 10 (2020).
- 730 92. Belzer, C. & de Vos, W. M. Microbes inside—from diversity to function: the case of  
731 Akkermansia. *The ISME Journal* **6**, 1449–1458 (2012).

- 732 93. Ganesh, B. P., Klopfleisch, R., Loh, G. & Blaut, M. Commensal *Akkermansia muciniphila*  
733 exacerbates gut inflammation in *Salmonella* Typhimurium-infected gnotobiotic mice. *PLOS*  
734 *ONE* **8**, e74963 (2013).
- 735 94. Donaldson, D. S. *et al.* M cell-depletion blocks oral prion disease pathogenesis. *Mucosal*  
736 *Immunology* **5**, 216–225 (2012).
- 737 95. Derrien, M., Belzer, C. & de Vos, W. M. *Akkermansia muciniphila* and its role in  
738 regulating host functions. *Microbial Pathogenesis* **106**, 171–181 (2017).
- 739 96. Nagalingam, N. A., Kao, J. Y. & Young, V. B. Microbial ecology of the murine gut  
740 associated with the development of DSS- colitis. *Inflamm Bowel Dis* **17**, 917–926 (2011).
- 741 97. Huttenhower, C. *et al.* Structure, function and diversity of the healthy human microbiome.  
742 *Nature* **486**, 207–214 (2012).
- 743 98. Sinha, R. *et al.* Collecting fecal samples for microbiome analyses in epidemiology studies.  
744 *Cancer Epidemiology Biomarkers & Prevention* **25**, 407–416 (2016).
- 745

746 **Figure 1 – Microbial composition and diversity by provenance**

747 a) Microbial composition (Unweighted UniFrac) differed significantly by provenance

748 (PERMANOVA  $p = 0.001$ ). Farm 1 deer are featured in green circles and red diamonds.

749 Farm 2 deer are featured in blue circles and yellow diamonds. Free-ranging deer are

750 featured in purple circles.

751 b) Microbial diversity as measured by the Shannon Diversity Index differed significantly by

752 provenance ( $p = 6.5 \times 10^{-11}$ ). All pairwise comparisons  $*p < 0.001$ .

753 c) Farmed deer have more similar microbial communities to each other than to free-ranging

754 deer (Unweighted UniFrac pairwise PERMANOVA: Farm 1 to Farm 2 pseudo-F = 9,  $q =$

755 0.001; Farm 1 to Free-ranging pseudo-F = 38,  $q = 0.001$ ; Farm 2 to Free-ranging pseudo

756 F = 18,  $q = 0.001$ );).

757

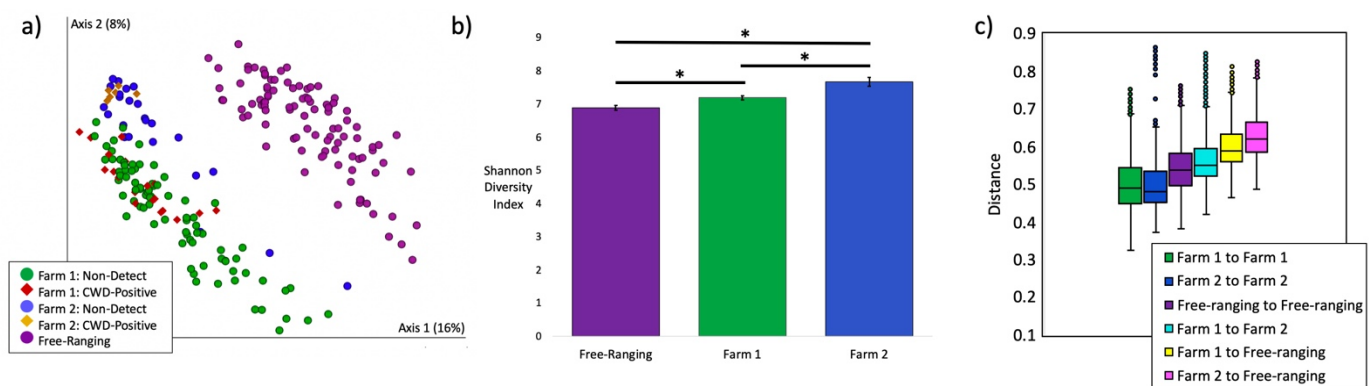

758 **Figure 2 – Microbial composition and diversity by sex**

- 759 a) Gut microbial composition (unweighted UniFrac) differed significantly by sex on Farm 1  
760 (PERMANOVA  $p = 0.008$ ) and in Free-ranging deer (PERMANOVA  $p = 0.018$ ), but not  
761 on Farm 2 (PERMANOVA  $p = 0.179$ ). Farm 1 = green. Farm 2 = blue. Free-ranging =  
762 purple. Males = circles. Females = diamonds.
- 763 b) Microbial diversity as measured by the Shannon Diversity Index did not differ  
764 significantly by sex (Farm 1:  $p = 0.34$ , Farm 2:  $p = 0.15$ , Free-ranging:  $p = 0.53$ ) or CWD  
765 status (Farm 1:  $p = 0.07$ , Farm 2:  $0.26$ ).

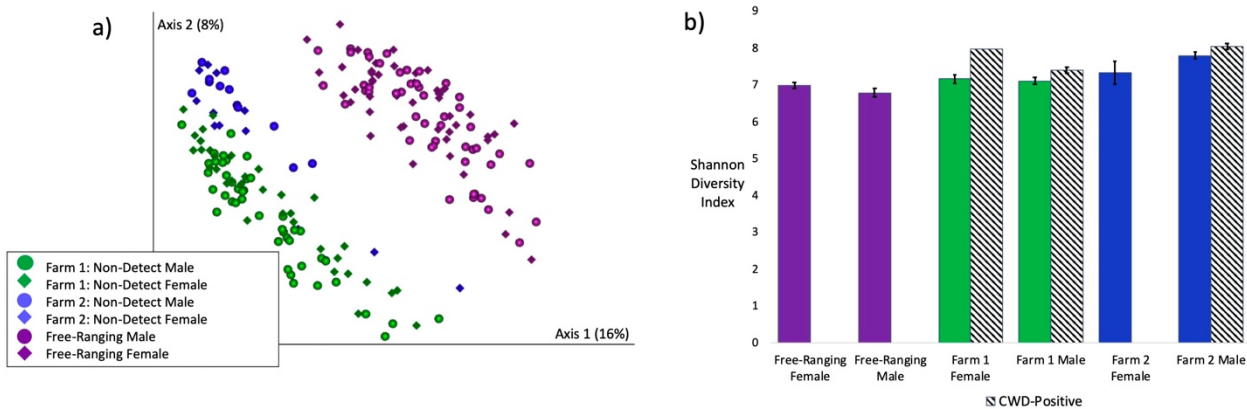

766

767 **Figure 3 – Differentially abundant microbial taxa by CWD Status**

768 Differentially abundant taxa by CWD Status, including a) an L7 (roughly species) level  
769 taxa in the Bacilli class, order RF39, b) a second L7 level taxa in the Bacilli class, order  
770 RF39, c) an L7 level taxa in the Lachnospiraceae UCG-10 family, d) an L7 level taxa in  
771 the Akkermansia family, e) an ASV (roughly strain level) in the Bacilli class, order RF39  
772 (formerly Mollicutes RF39), f) an ASV in the Lachnospiraceae UCG-10 family, g) an  
773 ASV in the Akkermansia family, h) a second ASV also in the Akkermansia family. Free-  
774 ranging deer (all male) did not contain any reads of the Bacilli RF39 or Akkermansia (2)  
775 ASVs.

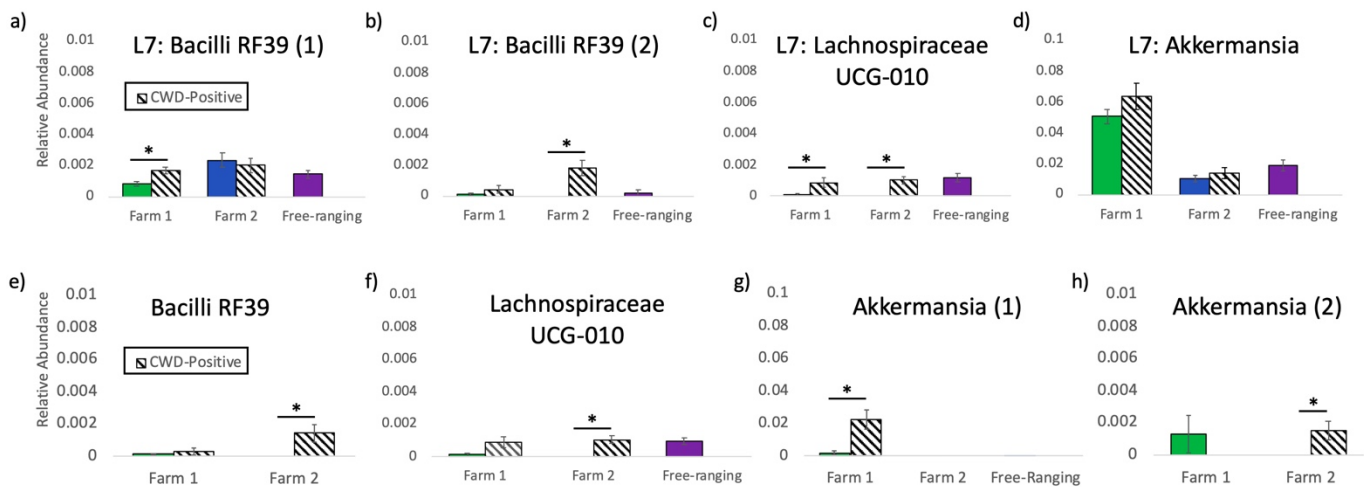

776 **Supplemental Figure 1 – Microbial composition by provenance and sex:**

777 a) Microbial composition (weighted UniFrac) differed significantly by provenance  
778 (PERMANOVA  $p = 0.001$ ). Farm 1 deer are featured in green circles and red diamonds.

779 Farm 2 deer are featured in blue circles and yellow diamonds. Free-ranging deer are  
780 featured in purple circles.

781 b) Gut microbial composition (weighted UniFrac) differed significantly by sex on Farm 1  
782 (PERMANOVA  $p = 0.003$ ), trended toward significance in free-ranging deer

783 (PERMANOVA  $p = 0.066$ ), but did not differ significantly on Farm 2 (PERMANOVA  $p$   
784  $= 0.115$ ). Farm 1 = green. Farm 2 = blue. Free-ranging = purple. Males = circles. Females

785 = diamonds

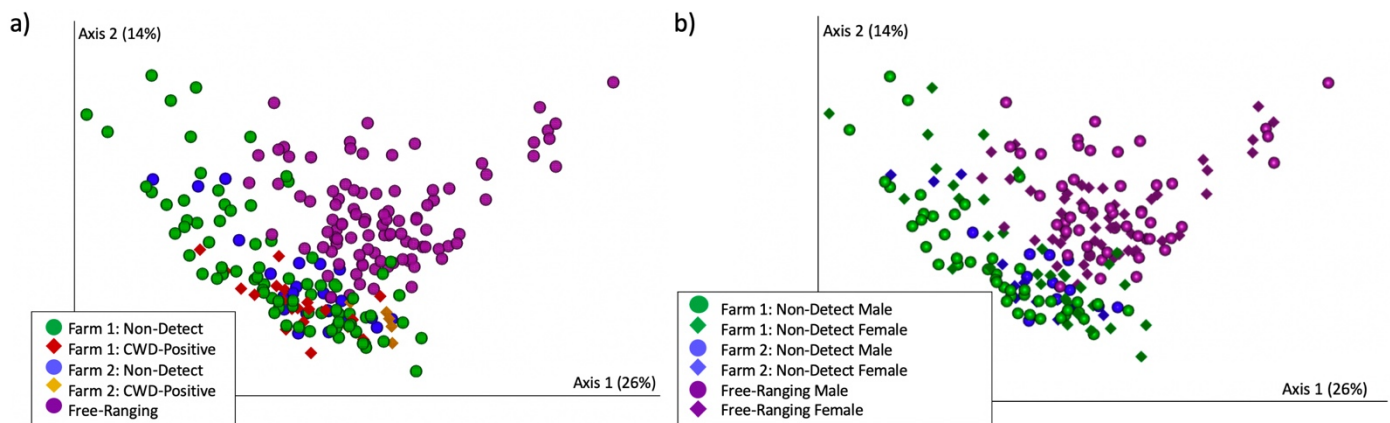

786



**Supplemental Table 1: Differentially abundant taxa (ANCOM) between farmed and free-ranging white-tailed deer.**

| Microbial Taxa                                                                                                                                                 | Increased in Free-Ranging | W   | Reject null hypothesis |
|----------------------------------------------------------------------------------------------------------------------------------------------------------------|---------------------------|-----|------------------------|
| D_0_Bacteria;D_1_Firmicutes;D_2_Clostridia;D_3_Clostridiales;D_4_Lachnospiraceae;D_5_[Eubacterium] oxidoreducens group;D_6_uncultured bacterium                | YES                       | 606 | TRUE                   |
| D_0_Bacteria;D_1_Firmicutes;D_2_Clostridia;D_3_Clostridiales;D_4_Lachnospiraceae;D_5_Roseburia;                                                                | YES                       | 603 | TRUE                   |
| D_0_Bacteria;D_1_Bacteroidetes;D_2_Bacteroidia;D_3_Bacteroidales;D_4_Bacteroidales RF16 group;                                                                 | NO                        | 602 | TRUE                   |
| D_0_Bacteria;D_1_Bacteroidetes;D_2_Bacteroidia;D_3_Bacteroidales;D_4_Prevotellaceae;D_5_Prevotellaceae UCG-001;D_6_uncultured bacterium                        | YES                       | 602 | TRUE                   |
| D_0_Bacteria;D_1_Firmicutes;D_2_Clostridia;D_3_Clostridiales;D_4_Lachnospiraceae;D_5_Lachnospiraceae UCG-007;D_6_uncultured bacterium                          | YES                       | 602 | TRUE                   |
| D_0_Bacteria;D_1_Proteobacteria;D_2_Gammaproteobacteria;D_3_Betaproteobacteria;D_4_Burkholderiaceae;                                                           | YES                       | 602 | TRUE                   |
| D_0_Bacteria;D_1_Bacteroidetes;D_2_Bacteroidia;D_3_Bacteroidales;D_4_Prevotellaceae;D_5_Prevotellaceae UCG-003;D_6_uncultured Bacteroidales bacterium          | NO                        | 599 | TRUE                   |
| D_0_Bacteria;D_1_Firmicutes;D_2_Clostridia;D_3_Clostridiales;D_4_Lachnospiraceae;D_5_Acetivomaculum;D_6_uncultured bacterium                                   | YES                       | 594 | TRUE                   |
| D_0_Bacteria;D_1_Firmicutes;D_2_Negativicutes;D_3_Selenomonadales;D_4_Acidaminococcaceae;D_5_Phascoloractobacterium;D_6_uncultured Veillonellaceae bacterium   | NO                        | 591 | TRUE                   |
| D_0_Bacteria;D_1_Firmicutes;D_2_Clostridia;D_3_Clostridiales;D_4_Ruminococcaceae;D_5_Ruminococcaceae UCG-005;D_6_metagenome                                    | YES                       | 588 | TRUE                   |
| D_0_Bacteria;D_1_Spirochaetes;D_2_Spirochaetia;D_3_Spirochaetia;D_4_Spirochaetia;D_5_Treponema 2;D_6_uncultured bacterium                                      | NO                        | 588 | TRUE                   |
| D_0_Bacteria;D_1_Firmicutes;D_2_Clostridia;D_3_Clostridiales;D_4_Ruminococcaceae;D_5_Oscillibacter;D_6_uncultured bacterium                                    | YES                       | 587 | TRUE                   |
| D_0_Bacteria;D_1_Firmicutes;D_2_Clostridia;D_3_Clostridiales;D_4_Lachnospiraceae;D_5_Lachnospiraceae FCS20 group;D_6_uncultured bacterium                      | YES                       | 586 | TRUE                   |
| D_0_Bacteria;D_1_Firmicutes;D_2_Erysipelotrichia;D_3_Erysipelotrichales;D_4_Erysipelotrichaceae;D_5_Candidatus Stoqueficoccus;D_6_uncultured bacterium         | YES                       | 585 | TRUE                   |
| D_0_Bacteria;D_1_Firmicutes;D_2_Negativicutes;D_3_Selenomonadales;D_4_Acidaminococcaceae;D_5_Phascoloractobacterium;D_6_uncultured bacterium                   | YES                       | 585 | TRUE                   |
| D_0_Bacteria;D_1_Firmicutes;D_2_Clostridia;D_3_Clostridiales;D_4_Lachnospiraceae;D_5_Anaerostipes;D_6_uncultured bacterium                                     | YES                       | 581 | TRUE                   |
| D_0_Bacteria;D_1_Firmicutes;D_2_Clostridia;D_3_Clostridiales;D_4_Lachnospiraceae;D_5_Lachnospiraceae UCG-001;D_6_uncultured Lachnospiraceae bacterium          | YES                       | 580 | TRUE                   |
| D_0_Bacteria;D_1_Bacteroidetes;D_2_Bacteroidia;D_3_Bacteroidales;D_4_Marinifilaceae;D_5_Butyricimonas;                                                         | NO                        | 572 | TRUE                   |
| D_0_Bacteria;D_1_Bacteroidetes;D_2_Bacteroidia;D_3_Bacteroidales;D_4_Bacteroidales RF16 group;D_5_uncultured bacterium;D_6_uncultured bacterium                | NO                        | 571 | TRUE                   |
| D_0_Bacteria;D_1_Firmicutes;D_2_Clostridia;D_3_Clostridiales;D_4_Ruminococcaceae;D_5_Ruminococcaceae UCG-002;D_6_uncultured bacterium                          | NO                        | 563 | TRUE                   |
| D_0_Bacteria;D_1_Firmicutes;D_2_Clostridia;D_3_Clostridiales;D_4_Lachnospiraceae;D_5_[Bacteroides] pectinophilus group;D_6_uncultured rumen bacterium          | YES                       | 562 | TRUE                   |
| D_0_Bacteria;D_1_Proteobacteria;D_2_Deltaproteobacteria;D_3_Desulfobivibrionales;D_4_Desulfobivibrionaceae;D_5_Mailhella;D_6_uncultured bacterium              | NO                        | 562 | TRUE                   |
| D_0_Bacteria;D_1_Bacteroidetes;D_2_Bacteroidia;D_3_Bacteroidales;D_4_Prevotellaceae;D_5_Prevotellaceae Ga6A1 group;D_6_uncultured bacterium                    | YES                       | 560 | TRUE                   |
| D_0_Bacteria;D_1_Firmicutes;D_2_Clostridia;D_3_Clostridiales;D_4_Ruminococcaceae;D_5_Ruminococcaceae UCG-005;D_6_uncultured rumen bacterium                    | YES                       | 560 | TRUE                   |
| D_0_Bacteria;D_1_Firmicutes;D_2_Clostridia;D_3_Clostridiales;D_4_Ruminococcaceae;D_5_Ruminococcaceae UCG-013;                                                  | YES                       | 559 | TRUE                   |
| **D_0_Bacteria;D_1_Firmicutes;D_2_Bacilli;D_3_Izimaplasmatales;D_4_uncultured bacterium;D_5_uncultured bacterium;D_6_uncultured bacterium                      | NO                        | 556 | TRUE                   |
| D_0_Bacteria;D_1_Actinobacteria;D_2_Actinobacteria;D_3_Bifidobacteriales;D_4_Bifidobacteriaceae;D_5_Aeriscardovia;D_6_uncultured bacterium                     | NO                        | 555 | TRUE                   |
| D_0_Bacteria;D_1_Bacteroidetes;D_2_Bacteroidia;D_3_Bacteroidales;D_4_Barnesiellaceae;D_5_uncultured;D_6_uncultured Porphyromonadaceae bacterium                | NO                        | 555 | TRUE                   |
| D_0_Bacteria;D_1_Firmicutes;D_2_Clostridia;D_3_Clostridiales;D_4_Ruminococcaceae;D_5_Negativibacillus;D_6_uncultured bacterium                                 | NO                        | 552 | TRUE                   |
| D_0_Bacteria;D_1_Firmicutes;D_2_Clostridia;D_3_Clostridiales;D_4_Ruminococcaceae;D_5_Ruminococcaceae UCG-002;                                                  | NO                        | 552 | TRUE                   |
| D_0_Bacteria;D_1_Firmicutes;D_2_Clostridia;D_3_Clostridiales;D_4_Lachnospiraceae;D_5_Marvinbryantia;D_6_uncultured bacterium                                   | YES                       | 545 | TRUE                   |
| D_0_Bacteria;D_1_Bacteroidetes;D_2_Bacteroidia;D_3_Bacteroidales;D_4_Barnesiellaceae;                                                                          | YES                       | 543 | TRUE                   |
| D_0_Bacteria;D_1_Firmicutes;D_2_Clostridia;D_3_Clostridiales;D_4_Ruminococcaceae;D_5_[Eubacterium] coprostanoligenes group;D_6_uncultured rumen bacterium      | NO                        | 543 | TRUE                   |
| D_0_Bacteria;D_1_Proteobacteria;D_2_Gammaproteobacteria;D_3_Betaproteobacteria;D_4_Burkholderiaceae;D_5_Parasuterella;D_6_uncultured Burkholderiales bacterium | NO                        | 543 | TRUE                   |
| D_0_Bacteria;D_1_Firmicutes;D_2_Clostridia;D_3_Clostridiales;D_4_Lachnospiraceae;D_5_Dorea;D_6_uncultured Lachnospiraceae bacterium                            | NO                        | 541 | TRUE                   |
| D_0_Bacteria;D_1_Firmicutes;D_2_Clostridia;D_3_Clostridiales;D_4_Lachnospiraceae;D_5_Marvinbryantia;                                                           | YES                       | 533 | TRUE                   |
| D_0_Bacteria;D_1_Firmicutes;D_2_Clostridia;D_3_Clostridiales;D_4_Ruminococcaceae;D_5_Ruminococcaceae NK4A214 group;D_6_uncultured bacterium                    | YES                       | 529 | TRUE                   |
| D_0_Bacteria;D_1_Firmicutes;D_2_Clostridia;D_3_Clostridiales;D_4_Family XIII;D_5_Family XIII A03011 group;                                                     | NO                        | 522 | TRUE                   |
| D_0_Bacteria;D_1_Bacteroidetes;D_2_Bacteroidia;D_3_Bacteroidales;D_4_uncultured;                                                                               | NO                        | 521 | TRUE                   |
| D_0_Bacteria;D_1_Firmicutes;D_2_Clostridia;D_3_Clostridiales;D_4_Family XIII;D_5_Mogibacterium;D_6_uncultured rumen bacterium                                  | NO                        | 521 | TRUE                   |
| D_0_Bacteria;D_1_Firmicutes;D_2_Clostridia;D_3_Clostridiales;D_4_Lachnospiraceae;D_5_[Eubacterium] ruminantium group;D_6_uncultured bacterium                  | NO                        | 515 | TRUE                   |
| D_0_Bacteria;D_1_Firmicutes;D_2_Clostridia;D_3_Clostridiales;D_4_Lachnospiraceae;D_5_Lachnospiraceae NK4A136 group;D_6_uncultured Lachnospiraceae bacterium    | YES                       | 514 | TRUE                   |
| D_0_Bacteria;D_1_Bacteroidetes;D_2_Bacteroidia;D_3_Bacteroidales;D_4_Prevotellaceae;D_5_Alloprevotella;D_6_uncultured Bacteroidales bacterium                  | NO                        | 513 | TRUE                   |
| D_0_Bacteria;D_1_Firmicutes;D_2_Clostridia;D_3_Clostridiales;D_4_Ruminococcaceae;D_5_Ruminococcaceae UCG-005;                                                  | YES                       | 512 | TRUE                   |
| D_0_Bacteria;D_1_Firmicutes;D_2_Clostridia;D_3_Clostridiales;D_4_Lachnospiraceae;D_5_Blautia;                                                                  | YES                       | 506 | TRUE                   |
| D_0_Bacteria;D_1_Bacteroidetes;D_2_Bacteroidia;D_3_Bacteroidales;D_4_uncultured;D_5_uncultured Bacteroidales bacterium;D_6_uncultured Bacteroidales bacterium  | NO                        | 505 | TRUE                   |
| D_0_Bacteria;D_1_Bacteroidetes;D_2_Bacteroidia;D_3_Bacteroidales;D_4_Bacteroidaceae;D_5_Bacteroides;D_6_uncultured bacterium                                   | NO                        | 503 | TRUE                   |
| D_0_Bacteria;D_1_Proteobacteria;D_2_Gammaproteobacteria;D_3_Aeromonadales;D_4_Succinivibrionaceae;D_5_Succinivibrio;D_6_uncultured Succinivibrio sp.           | NO                        | 500 | TRUE                   |
| D_0_Bacteria;D_1_Bacteroidetes;D_2_Bacteroidia;D_3_Bacteroidales;D_4_Barnesiellaceae;D_5_uncultured;                                                           | YES                       | 499 | TRUE                   |
| D_0_Bacteria;D_1_Firmicutes;D_2_Clostridia;D_3_Clostridiales;D_4_Lachnospiraceae;D_5_GCA-900066575;D_6_uncultured bacterium                                    | YES                       | 499 | TRUE                   |
| D_0_Bacteria;D_1_Firmicutes;D_2_Clostridia;D_3_Clostridiales;D_4_Lachnospiraceae;D_5_Anaerostipes;                                                             | YES                       | 496 | TRUE                   |
| D_0_Bacteria;D_1_Bacteroidetes;D_2_Bacteroidia;D_3_Bacteroidales;D_4_Prevotellaceae;D_5_Prevotellaceae UCG-003;                                                | NO                        | 495 | TRUE                   |
| D_0_Bacteria;D_1_Bacteroidetes;D_2_Bacteroidia;D_3_Bacteroidales;D_4_Rikenellaceae;D_5_Alistipes;D_6_uncultured Bacteroidetes bacterium                        | NO                        | 495 | TRUE                   |
| D_0_Bacteria;D_1_Bacteroidetes;D_2_Bacteroidia;D_3_Bacteroidales;D_4_Rikenellaceae;D_5_Rikenellaceae RC9 gut group;D_6_uncultured Bacteroidales bacterium      | NO                        | 493 | TRUE                   |
| D_0_Bacteria;D_1_Firmicutes;D_2_Clostridia;D_3_Clostridiales;D_4_Ruminococcaceae;D_5_Ruminococcus 1;D_6_Ruminococcus flavefaciens                              | NO                        | 492 | TRUE                   |
| D_0_Bacteria;D_1_Bacteroidetes;D_2_Bacteroidia;D_3_Bacteroidales;D_4_Paludibacteraceae;D_5_uncultured;D_6_uncultured Paludibacter sp.                          | NO                        | 489 | TRUE                   |
| **D_0_Bacteria;D_1_Firmicutes;D_2_Bacilli;D_3_EMP-G18;D_4_uncultured Bacilli bacterium;D_5_uncultured Bacilli bacterium;D_6_uncultured Bacilli bacterium       | NO                        | 487 | TRUE                   |
| D_0_Bacteria;D_1_Bacteroidetes;D_2_Bacteroidia;D_3_Bacteroidales;D_4_Rikenellaceae;D_5_Rikenellaceae RC9 gut group;                                            | NO                        | 485 | TRUE                   |
| D_0_Bacteria;D_1_Firmicutes;D_2_Clostridia;D_3_Clostridiales;D_4_Lachnospiraceae;D_5_Agathobacter;D_6_uncultured bacterium                                     | NO                        | 485 | TRUE                   |
| D_0_Bacteria;D_1_Bacteroidetes;D_2_Bacteroidia;D_3_Bacteroidales;D_4_Marinifilaceae;D_5_Odoribacter;D_6_uncultured Bacteroidales bacterium                     | NO                        | 484 | TRUE                   |

**Supplemental Table 1 Continued: Differentially abundant taxa (ANCOM) between farmed and free-ranging white-tailed deer.**

| Microbial Taxa                                                                                                                                                 | Increased in Free-Ranging | W   | Reject null hypothesis |
|----------------------------------------------------------------------------------------------------------------------------------------------------------------|---------------------------|-----|------------------------|
| D_0_Bacteria;D_1_Bacteroidetes;D_2_Bacteroidia;D_3_Bacteroidales;D_4_Prevotellaceae;D_5_Prevotellaceae NK3831 group;D_6_uncultured bacterium                   | NO                        | 484 | TRUE                   |
| D_0_Bacteria;D_1_Firmicutes;D_2_Clostridia;D_3_Clostridiales;D_4_Ruminococcaceae;D_5_Ruminococcaceae UCG-004;D_6_uncultured bacterium                          | NO                        | 484 | TRUE                   |
| D_0_Bacteria;D_1_Proteobacteria;D_2_Gammaproteobacteria;D_3_Enterobacteriales;D_4_Enterobacteriaceae;D_5_Escherichia-Shigella;__                               | NO                        | 484 | TRUE                   |
| D_0_Bacteria;D_1_Firmicutes;D_2_Clostridia;D_3_Clostridiales;D_4_Ruminococcaceae;D_5_Candidatus Soleaferrea;__                                                 | YES                       | 483 | TRUE                   |
| D_0_Bacteria;D_1_Lentisphaerae;D_2_Lentisphaeria;D_3_Victivallales;D_4_Victivallaceae;D_5_uncultured bacterium;D_6_uncultured bacterium                        | NO                        | 482 | TRUE                   |
| **D_0_Bacteria;D_1_Firmicutes;D_2_Bacilli;D_3_Izimaplasmatales;D_4_uncultured organism;D_5_uncultured organism;D_6_uncultured organism                         | YES                       | 480 | TRUE                   |
| D_0_Bacteria;D_1_Bacteroidetes;D_2_Bacteroidia;D_3_Bacteroidales;D_4_Prevotellaceae;D_5_Prevotellaceae UCG-001;D_6_uncultured Bacteroidales bacterium          | NO                        | 478 | TRUE                   |
| D_0_Archaea;D_1_Euryarchaeota;D_2_Methanobacteria;D_3_Methanobacteriales;D_4_Methanobacteriaceae;D_5_Methanobrevibacter;__                                     | NO                        | 476 | TRUE                   |
| D_0_Bacteria;D_1_Bacteroidetes;D_2_Bacteroidia;D_3_Bacteroidales;D_4_F082;D_5_uncultured bacterium;D_6_uncultured bacterium                                    | NO                        | 474 | TRUE                   |
| D_0_Bacteria;D_1_Bacteroidetes;D_2_Bacteroidia;D_3_Bacteroidales;D_4_Rikenellaceae;D_5_dgA-11 gut group;D_6_uncultured bacterium                               | NO                        | 474 | TRUE                   |
| D_0_Bacteria;D_1_Bacteroidetes;D_2_Bacteroidia;D_3_Bacteroidales;D_4_Bacteroidaceae;D_5_Bacteroides;D_6_uncultured Bacteroides sp.                             | NO                        | 473 | TRUE                   |
| D_0_Bacteria;D_1_Bacteroidetes;D_2_Bacteroidia;D_3_Bacteroidales;D_4_Paludibacteriaceae;D_5_Paludibacter;__                                                    | NO                        | 473 | TRUE                   |
| D_0_Bacteria;D_1_Firmicutes;D_2_Clostridia;D_3_Clostridiales;D_4_Family XIII;D_5_[Eubacterium] nodatum group;D_6_uncultured bacterium                          | NO                        | 471 | TRUE                   |
| D_0_Archaea;D_1_Euryarchaeota;D_2_Methanomicrobia;D_3_Methanomicrobiales;D_4_Methanocorpusculaceae;D_5_Methanocorpusculum;D_6_uncultured methanogenic archaeon | NO                        | 469 | TRUE                   |
| D_0_Bacteria;D_1_Firmicutes;D_2_Clostridia;D_3_Clostridiales;D_4_Ruminococcaceae;D_5_Ruminiclostridium 1;D_6_uncultured rumen bacterium                        | NO                        | 468 | TRUE                   |
| D_0_Bacteria;D_1_Firmicutes;D_2_Clostridia;D_3_Clostridiales;D_4_Lachnospiraceae;D_5_Lachnospiraceae UCG-010;__                                                | YES                       | 467 | TRUE                   |
| D_0_Bacteria;D_1_Firmicutes;D_2_Clostridia;D_3_Clostridiales;D_4_Lachnospiraceae;D_5_Lachnospiraceae UCG-010;D_6_uncultured bacterium                          | YES                       | 464 | TRUE                   |
| D_0_Bacteria;D_1_Proteobacteria;D_2_Gammaproteobacteria;D_3_Aeromonadales;D_4_Succinivibrionaceae;D_5_Succinivibrio;__                                         | YES                       | 463 | TRUE                   |
| D_0_Bacteria;D_1_Bacteroidetes;D_2_Bacteroidia;D_3_Bacteroidales;D_4_Rikenellaceae;D_5_Alistipes;D_6_uncultured bacterium                                      | NO                        | 459 | TRUE                   |
| D_0_Bacteria;D_1_Firmicutes;D_2_Clostridia;D_3_Clostridiales;D_4_Ruminococcaceae;D_5_Faecalibacterium;__                                                       | YES                       | 457 | TRUE                   |
| D_0_Bacteria;D_1_Proteobacteria;D_2_Alphaproteobacteria;D_3_Rhodospirillales;D_4_uncultured;__;                                                                | YES                       | 457 | TRUE                   |
| D_0_Bacteria;D_1_Firmicutes;D_2_Clostridia;D_3_Clostridiales;D_4_Lachnospiraceae;D_5_Lachnospiraceae NK4A136 group;D_6_uncultured organism                     | YES                       | 455 | TRUE                   |
| Taxa in the Ruminococcaceae and Lachnospiraceae families are highlighted in green. 25 of 38 of these taxa are increased in free-ranging deer.                  |                           |     |                        |
| Taxa in the Bacteroidales order are highlighted in yellow. 22 of 26 of these taxa are increased in the farmed deer.                                            |                           |     |                        |
| **formerly phylum Tenericutes, class Mollicutes                                                                                                                |                           |     |                        |

**Supplemental Table 2: Differentially abundant taxa (ANCOM) by sex in free-ranging white-tailed deer.**

| Microbial Taxa                                                                                                                                                      | Increased in Males? | W  | Reject null hypothesis |
|---------------------------------------------------------------------------------------------------------------------------------------------------------------------|---------------------|----|------------------------|
| D_0_Bacteria;D_1_Firmicutes;D_2_Clostridia;D_3_Clostridiales;D_4_Ruminococcaceae;D_5_Oscillibacter;__                                                               | YES                 | 49 | TRUE                   |
| D_0_Bacteria;D_1_Firmicutes;D_2_Clostridia;D_3_Clostridiales;D_4_Lachnospiraceae;D_5_GCA-900066575;D_6_uncultured bacterium                                         | YES                 | 47 | TRUE                   |
| D_0_Bacteria;D_1_Proteobacteria;D_2_Gammaproteobacteria;D_3_Aeromonadales;D_4_Succinivibrionaceae;D_5_Succinivibrio;__                                              | YES                 | 13 | TRUE                   |
| D_0_Bacteria;D_1_Firmicutes;D_2_Bacilli;D_3_EMP-G18;D_4_uncultured bacterium;D_5_uncultured bacterium;D_6_uncultured bacterium                                      | NO                  | 11 | TRUE                   |
| D_0_Bacteria;D_1_Bacteroidetes;D_2_Bacteroidia;D_3_Bacteroidales;D_4_Prevotellaceae;__;__                                                                           | YES                 | 7  | TRUE                   |
| D_0_Bacteria;D_1_Proteobacteria;D_2_Alphaproteobacteria;D_3_Rhodospirillales;D_4_uncultured;D_5_gut metagenome;D_6_gut metagenome                                   | YES                 | 6  | TRUE                   |
| D_0_Bacteria;D_1_Firmicutes;D_2_Clostridia;D_3_Clostridiales;D_4_Eubacteriaceae;D_5_Anaerofustis;D_6_uncultured bacterium                                           | NO                  | 5  | TRUE                   |
| D_0_Bacteria;D_1_Firmicutes;D_2_Clostridia;D_3_Clostridiales;D_4_Lachnospiraceae;D_5_Dorea;D_6_uncultured Lachnospiraceae bacterium                                 | NO                  | 5  | TRUE                   |
| D_0_Bacteria;D_1_Firmicutes;D_2_Clostridia;D_3_Clostridiales;D_4_Ruminococcaceae;D_5_Ruminococcaceae UCG-007;D_6_uncultured rumen bacterium                         | NO                  | 5  | TRUE                   |
| D_0_Archaea;D_1_Euryarchaeota;D_2_Thermoplasmata;D_3_Methanomassiliicoccales;D_4_Methanomethylphilaceae;__;__                                                       | YES                 | 4  | TRUE                   |
| D_0_Bacteria;D_1_Bacteroidetes;D_2_Bacteroidia;D_3_Bacteroidales;D_4_Marinifilaceae;D_5_Sanguibacteroides;D_6_Gabonibacter massiliensis                             | NO                  | 4  | TRUE                   |
| D_0_Bacteria;D_1_Firmicutes;D_2_Clostridia;D_3_Clostridiales;D_4_Lachnospiraceae;D_5_Lachnospiraceae NK4B4 group;__                                                 | NO                  | 4  | TRUE                   |
| D_0_Bacteria;D_1_Firmicutes;D_2_Clostridia;D_3_Clostridiales;D_4_Ruminococcaceae;D_5_Ruminococcaceae UCG-013;D_6_uncultured Clostridiaceae bacterium                | NO                  | 4  | TRUE                   |
| D_0_Bacteria;D_1_Firmicutes;D_2_Clostridia;D_3_Clostridiales;D_4_Lachnospiraceae;D_5_[Acetivibrio] ethanolognignens group;__                                        | NO                  | 3  | TRUE                   |
| D_0_Bacteria;D_1_Firmicutes;D_2_Clostridia;D_3_Clostridiales;D_4_Lachnospiraceae;D_5_Lachnospiraceae NK4A136 group;D_6_uncultured rumen bacterium                   | YES                 | 3  | TRUE                   |
| D_0_Bacteria;D_1_Actinobacteria;D_2_Actinobacteria;__;__;__                                                                                                         | NO                  | 2  | TRUE                   |
| D_0_Bacteria;D_1_Cyanobacteria;D_2_Melainabacteria;D_3_Gastranaerophilales;__;__;__                                                                                 | YES                 | 2  | TRUE                   |
| D_0_Bacteria;D_1_Deferribacteres;D_2_Deferribacteres;D_3_Deferribacterales;D_4_Deferribacteraceae;D_5_Mucispirillum;D_6_bacterium 'Lincoln Park 3'                  | NO                  | 2  | TRUE                   |
| D_0_Bacteria;D_1_Firmicutes;D_2_Clostridia;D_3_Clostridiales;D_4_Christensenellaceae;D_5_Christensenellaceae R-7 group;D_6_bacterium AC2043                         | NO                  | 2  | TRUE                   |
| D_0_Bacteria;D_1_Firmicutes;D_2_Clostridia;D_3_Clostridiales;D_4_Clostridiaceae 1;D_5_Clostridium sensu stricto 1;D_6_human gut metagenome                          | NO                  | 2  | TRUE                   |
| D_0_Bacteria;D_1_Firmicutes;D_2_Clostridia;D_3_Clostridiales;D_4_Family XIII;D_5_Mogibacterium;D_6_uncultured bacterium                                             | NO                  | 2  | TRUE                   |
| D_0_Bacteria;D_1_Firmicutes;D_2_Clostridia;D_3_Clostridiales;D_4_Family XIII;D_5_uncultured;__                                                                      | NO                  | 2  | TRUE                   |
| D_0_Bacteria;D_1_Firmicutes;D_2_Clostridia;D_3_Clostridiales;D_4_Lachnospiraceae;D_5_Acetitomaculum;D_6_uncultured rumen bacterium                                  | NO                  | 2  | TRUE                   |
| D_0_Bacteria;D_1_Firmicutes;D_2_Clostridia;D_3_Clostridiales;D_4_Lachnospiraceae;D_5_Coprococcus 2;D_6_uncultured rumen bacterium                                   | NO                  | 2  | TRUE                   |
| D_0_Bacteria;D_1_Firmicutes;D_2_Clostridia;D_3_Clostridiales;D_4_Lachnospiraceae;D_5_Eisenbergiella;D_6_uncultured bacterium                                        | NO                  | 2  | TRUE                   |
| D_0_Bacteria;D_1_Firmicutes;D_2_Clostridia;D_3_Clostridiales;D_4_Lachnospiraceae;D_5_GCA-900066575;__                                                               | NO                  | 2  | TRUE                   |
| D_0_Bacteria;D_1_Firmicutes;D_2_Clostridia;D_3_Clostridiales;D_4_Lachnospiraceae;D_5_Lachnospiraceae NK3A20 group;D_6_uncultured Firmicutes bacterium               | NO                  | 2  | TRUE                   |
| D_0_Bacteria;D_1_Firmicutes;D_2_Clostridia;D_3_Clostridiales;D_4_Lachnospiraceae;D_5_Lachnospiraceae UCG-009;D_6_uncultured bacterium                               | NO                  | 2  | TRUE                   |
| D_0_Bacteria;D_1_Firmicutes;D_2_Clostridia;D_3_Clostridiales;D_4_Lachnospiraceae;D_5_Lachnospiraceae UCG-010;D_6_uncultured organism                                | NO                  | 2  | TRUE                   |
| D_0_Bacteria;D_1_Firmicutes;D_2_Clostridia;D_3_Clostridiales;D_4_Lachnospiraceae;D_5_Shuttleworthia;D_6_uncultured bacterium                                        | YES                 | 2  | TRUE                   |
| D_0_Bacteria;D_1_Firmicutes;D_2_Clostridia;D_3_Clostridiales;D_4_Peptococcaceae;D_5_uncultured;D_6_uncultured rumen bacterium                                       | YES                 | 2  | TRUE                   |
| D_0_Bacteria;D_1_Firmicutes;D_2_Clostridia;D_3_Clostridiales;D_4_Ruminococcaceae;D_5_[Eubacterium] coprostanoligenes group;D_6_uncultured Ruminococcaceae bacterium | YES                 | 2  | TRUE                   |
| D_0_Bacteria;D_1_Firmicutes;D_2_Clostridia;D_3_Clostridiales;D_4_Ruminococcaceae;D_5_Candidatus Soleaferrea;__                                                      | NO                  | 2  | TRUE                   |
| D_0_Bacteria;D_1_Firmicutes;D_2_Clostridia;D_3_Clostridiales;D_4_Ruminococcaceae;D_5_Ruminococcaceae UCG-010;D_6_uncultured rumen bacterium                         | YES                 | 2  | TRUE                   |
| D_0_Bacteria;D_1_Firmicutes;D_2_Clostridia;D_3_Clostridiales;D_4_Ruminococcaceae;D_5_Ruminococcaceae UCG-013;D_6_uncultured organism                                | NO                  | 2  | TRUE                   |
| D_0_Bacteria;D_1_Firmicutes;D_2_Erysipelotrichia;D_3_Erysipelotrichales;D_4_Erysipelotrichaceae;D_5_Erysipelatoclostridium;D_6_uncultured bacterium                 | NO                  | 2  | TRUE                   |
| D_0_Bacteria;D_1_Firmicutes;D_2_Negativicutes;D_3_Selenomonadales;D_4_Acidaminococcaceae;D_5_Phascolarctobacterium;__                                               | NO                  | 2  | TRUE                   |
| D_0_Bacteria;D_1_Lentisphaerae;D_2_Lentisphaeria;D_3_Victivallales;D_4_Victivallaceae;D_5_uncultured rumen bacterium;D_6_uncultured rumen bacterium                 | YES                 | 2  | TRUE                   |
| **D_0_Bacteria;D_1_Firmicutes;D_2_Bacilli;D_3_Izimaplasmatales;D_4_uncultured bacterium;D_5_uncultured bacterium;D_6_uncultured bacterium                           | YES                 | 2  | TRUE                   |
| D_0_Bacteria;D_1_Verrucomicrobia;D_2_Verrucomicrobiae;D_3_Opitales;D_4_Punicococcaceae;D_5_uncultured;D_6_uncultured bacterium                                      | NO                  | 2  | TRUE                   |

\*\*formerly in phylum Tenericutes, class Mollicutes

**Supplemental Table 3: Differentially abundant taxa (ANCOM) by CWD Status on Farm 1 at the L7 (roughly species) level.**

| Microbial Taxa                                                                                                                                                                                                                       | Increased in CWD-Positive | W  | Reject null hypothesis |
|--------------------------------------------------------------------------------------------------------------------------------------------------------------------------------------------------------------------------------------|---------------------------|----|------------------------|
| **D_0_Bacteria;D_1_Firmicutes;D_2_Bacilli;D_3_RF39;D_4_uncultured bacterium;D_5_uncultured bacterium;D_6_uncultured bacterium                                                                                                        | YES                       | 80 | TRUE                   |
| D_0_Bacteria;D_1_Bacteroidetes;D_2_Bacteroidia;D_3_Bacteroidales;D_4_Paludibacteraceae;D_5_uncultured;D_6_uncultured Paludibacter sp.                                                                                                | NO                        | 54 | TRUE                   |
| D_0_Bacteria;D_1_Cyanobacteria;D_2_Melainabacteria;D_3_Gastranaerophilales;D_4_uncultured bacterium;D_5_uncultured bacterium;D_6_uncultured bacterium                                                                                | YES                       | 34 | TRUE                   |
| D_0_Bacteria;D_1_Firmicutes;D_2_Clostridia;D_3_Clostridiales;D_4_Lachnospiraceae;D_5_Lachnospiraceae UCG-010;                                                                                                                        | YES                       | 28 | TRUE                   |
| D_0_Bacteria;D_1_Bacteroidetes;D_2_Bacteroidia;D_3_Bacteroidales;D_4_Prevotellaceae;D_5_Prevotellaceae UCG-001;D_6_uncultured Bacteroidales bacterium                                                                                | NO                        | 20 | TRUE                   |
| D_0_Bacteria;D_1_Bacteroidetes;D_2_Bacteroidia;D_3_Bacteroidales;D_4_Paludibacteraceae;D_5_Paludibacter;                                                                                                                             | NO                        | 18 | TRUE                   |
| D_0_Bacteria;D_1_Actinobacteria;D_2_Actinobacteria                                                                                                                                                                                   | NO                        | 16 | TRUE                   |
| D_0_Bacteria;D_1_Firmicutes;D_2_Clostridia;D_3_Clostridiales;D_4_Ruminococcaceae;D_5_Ruminococcaceae;D_6_uncultured bacterium                                                                                                        | YES                       | 16 | TRUE                   |
| D_0_Bacteria;D_1_Firmicutes;D_2_Clostridia;D_3_Clostridiales;D_4_Clostridiales;D_5_Clostridium sensu stricto 1;                                                                                                                      | NO                        | 14 | TRUE                   |
| **D_0_Bacteria;D_1_Firmicutes;D_2_Bacilli;D_3_RF39;D_4_uncultured Erysipelotrichaceae bacterium;D_5_uncultured Erysipelotrichaceae bacterium;D_6_uncultured Erysipelotrichaceae bacterium                                            | YES                       | 14 | TRUE                   |
| D_0_Bacteria;D_1_Firmicutes;D_2_Clostridia;D_3_Clostridiales;D_4_Ruminococcaceae;D_5_Ruminococcaceae UCG-013;D_6_uncultured bacterium                                                                                                | YES                       | 11 | TRUE                   |
| D_0_Bacteria;D_1_Firmicutes;D_2_Clostridia;D_3_Clostridiales;D_4_Erysipelotrichales;D_5_Erysipelotrichaceae;D_6_Turicibacter;                                                                                                        | YES                       | 9  | TRUE                   |
| D_0_Bacteria;D_1_Bacteroidetes;D_2_Bacteroidia;D_3_Bacteroidales;D_4_Rikenellaceae;D_5_djA-11 gut group;D_6_uncultured bacterium                                                                                                     | YES                       | 8  | TRUE                   |
| D_0_Bacteria;D_1_Bacteroidetes;D_2_Bacteroidia;D_3_Bacteroidales;D_4_Bacteroidales;D_5_Bacteroides;D_6_uncultured bacterium                                                                                                          | NO                        | 7  | TRUE                   |
| D_0_Bacteria;D_1_Firmicutes;D_2_Erysipelotrichia;D_3_Erysipelotrichales;D_4_Erysipelotrichaceae;D_5_Candidatus Stoquefichus;D_6_uncultured bacterium                                                                                 | NO                        | 7  | TRUE                   |
| D_0_Bacteria;D_1_Bacteroidetes;D_2_Bacteroidia;D_3_Bacteroidales;D_4_Rikenellaceae;D_5_Alistipes;                                                                                                                                    | NO                        | 6  | TRUE                   |
| D_0_Bacteria;D_1_Firmicutes;D_2_Clostridia;D_3_Clostridiales;D_4_Lachnospiraceae;D_5_Lachnospiraceae UCG-007;D_6_uncultured bacterium                                                                                                | YES                       | 6  | TRUE                   |
| D_0_Bacteria;D_1_Firmicutes;D_2_Clostridia;D_3_Clostridiales;D_4_Peptococcaceae;D_5_uncultured;D_6_uncultured organism                                                                                                               | NO                        | 6  | TRUE                   |
| D_0_Bacteria;D_1_Firmicutes;D_2_Erysipelotrichia;D_3_Erysipelotrichales;D_4_Erysipelotrichaceae;D_5_Breznakia;D_6_uncultured bacterium                                                                                               | NO                        | 6  | TRUE                   |
| **D_0_Bacteria;D_1_Firmicutes;D_2_Bacilli;D_3_Izimaplasmatales                                                                                                                                                                       | NO                        | 6  | TRUE                   |
| D_0_Bacteria;D_1_Bacteroidetes;D_2_Bacteroidia;D_3_Bacteroidales;D_4_p-251-o5;D_5_uncultured bacterium;D_6_uncultured bacterium                                                                                                      | YES                       | 5  | TRUE                   |
| D_0_Bacteria;D_1_Firmicutes;D_2_Clostridia;D_3_Clostridiales;D_4_Ruminococcaceae;D_5_Ruminococcaceae;D_6_uncultured bacterium                                                                                                        | NO                        | 5  | TRUE                   |
| D_0_Bacteria;D_1_Firmicutes;D_2_Clostridia;D_3_Clostridiales;D_4_Ruminococcaceae;D_5_Ruminococcaceae UCG-009;D_6_uncultured bacterium                                                                                                | YES                       | 5  | TRUE                   |
| D_0_Bacteria;D_1_Firmicutes;D_2_Clostridia;D_3_Clostridiales;D_4_Ruminococcaceae;D_5_Ruminococcaceae UCG-010;                                                                                                                        | YES                       | 5  | TRUE                   |
| D_0_Bacteria;D_1_Bacteroidetes;D_2_Bacteroidia;D_3_Bacteroidales;D_4_Bacteroidales RF16 group;D_5_uncultured bacterium;D_6_uncultured bacterium                                                                                      | NO                        | 4  | TRUE                   |
| D_0_Bacteria;D_1_Bacteroidetes;D_2_Bacteroidia;D_3_Bacteroidales;D_4_Rikenellaceae;D_5_hoS-07005 gut group;D_6_uncultured Bacteroidales bacterium                                                                                    | YES                       | 4  | TRUE                   |
| D_0_Bacteria;D_1_Elusimicrobia;D_2_Elusimicrobia;D_3_Elusimicrobiales;D_4_Elusimicrobiaceae;D_5_Elusimicrobium;                                                                                                                      | NO                        | 4  | TRUE                   |
| D_0_Bacteria;D_1_Firmicutes;D_2_Bacilli;D_3_Lactobacillales;D_4_Streptococcaceae;D_5_Streptococcus;                                                                                                                                  | NO                        | 4  | TRUE                   |
| D_0_Bacteria;D_1_Firmicutes;D_2_Clostridia;D_3_Clostridiales;D_4_Clostridiales vadinBB60 group;D_5_Clostridiales bacterium enrichment culture clone 06-1235251-67;D_6_Clostridiales bacterium enrichment culture clone 06-1235251-67 | NO                        | 4  | TRUE                   |
| D_0_Bacteria;D_1_Firmicutes;D_2_Clostridia;D_3_Clostridiales;D_4 Family XIII;D_5 Family XIII UCG-001;D_6_uncultured bacterium                                                                                                        | NO                        | 4  | TRUE                   |
| D_0_Bacteria;D_1_Firmicutes;D_2_Clostridia;D_3_Clostridiales;D_4_Ruminococcaceae;D_5_[Eubacterium] coprostanoligenes group;D_6_uncultured bacterium                                                                                  | YES                       | 4  | TRUE                   |
| D_0_Bacteria;D_1_Firmicutes;D_2_Clostridia;D_3_Clostridiales;D_4_Ruminococcaceae;D_5_Ruminococcaceae UCG-010;D_6_uncultured bacterium                                                                                                | YES                       | 4  | TRUE                   |
| D_0_Bacteria;D_1_Firmicutes;D_2_Clostridia;D_3_Clostridiales;D_4_Ruminococcaceae;D_5_Ruminococcaceae UCG-014;D_6_uncultured Clostridiales bacterium                                                                                  | YES                       | 4  | TRUE                   |
| D_0_Bacteria;D_1_Bacteroidetes;D_2_Bacteroidia;D_3_Bacteroidales;D_4_Bacteroidales RF16 group;D_5_uncultured Paludibacter sp.;D_6_uncultured Paludibacter sp.                                                                        | NO                        | 3  | TRUE                   |
| D_0_Bacteria;D_1_Bacteroidetes;D_2_Bacteroidia;D_3_Bacteroidales;D_4_Barnesiellaceae;D_5_Barnesiella;D_6_uncultured bacterium                                                                                                        | NO                        | 3  | TRUE                   |
| D_0_Bacteria;D_1_Cyanobacteria;D_2_Melainabacteria;D_3_Gastranaerophilales;D_4_uncultured rumen bacterium;D_5_uncultured rumen bacterium;D_6_uncultured rumen bacterium                                                              | NO                        | 3  | TRUE                   |
| D_0_Bacteria;D_1_Firmicutes;D_2_Clostridia;D_3_Clostridiales;D_4_Christensenellaceae;D_5_Christensenellaceae R-7 group;D_6_uncultured bacterium                                                                                      | NO                        | 3  | TRUE                   |
| D_0_Bacteria;D_1_Firmicutes;D_2_Clostridia;D_3_Clostridiales;D_4_Lachnospiraceae;D_5_[Eubacterium] ruminantium group;                                                                                                                | NO                        | 3  | TRUE                   |
| D_0_Bacteria;D_1_Firmicutes;D_2_Clostridia;D_3_Clostridiales;D_4_Lachnospiraceae;D_5_Butyrylvibrio;                                                                                                                                  | NO                        | 3  | TRUE                   |
| D_0_Bacteria;D_1_Firmicutes;D_2_Erysipelotrichia;D_3_Erysipelotrichales;D_4_Erysipelotrichaceae;D_5_Erysipelotrichaceae;D_6_uncultured bacterium                                                                                     | NO                        | 3  | TRUE                   |
| D_0_Bacteria;D_1_Actinobacteria;D_2_Actinobacteria;D_3_Bifidobacteriales;D_4_Bifidobacteriaceae;D_5_Bifidobacterium;                                                                                                                 | NO                        | 2  | TRUE                   |
| D_0_Bacteria;D_1_Actinobacteria;D_2_Coriobacteria;D_3_Coriobacteriales;D_4_Eggerthellaceae;D_5_Slackia;                                                                                                                              | NO                        | 2  | TRUE                   |
| D_0_Bacteria;D_1_Bacteroidetes;D_2_Bacteroidia;D_3_Bacteroidales;D_4_Muribaculaceae;D_5_Muribaculum;D_6_Parabacteroides sp. YL27                                                                                                     | NO                        | 2  | TRUE                   |
| D_0_Bacteria;D_1_Bacteroidetes;D_2_Bacteroidia;D_3_Bacteroidales;D_4_Prevotellaceae;D_5_Prevotella 1;D_6_unidentified rumen bacterium RFN29                                                                                          | NO                        | 2  | TRUE                   |
| D_0_Bacteria;D_1_Bacteroidetes;D_2_Bacteroidia;D_3_Bacteroidales;D_4_Prevotellaceae;D_5_Prevotellaceae Ga6A1 group;D_6_uncultured bacterium                                                                                          | YES                       | 2  | TRUE                   |
| D_0_Bacteria;D_1_Bacteroidetes;D_2_Bacteroidia;D_3_Bacteroidales;D_4_Tannerellaceae;D_5_Parabacteroides;D_6_Parabacteroides goldsteinii ClO2712C30                                                                                   | YES                       | 2  | TRUE                   |
| D_0_Bacteria;D_1_Firmicutes;D_2_Clostridia;D_3_Clostridiales;D_4_Christensenellaceae;D_5_uncultured;D_6_uncultured bacterium                                                                                                         | NO                        | 2  | TRUE                   |
| D_0_Bacteria;D_1_Firmicutes;D_2_Clostridia;D_3_Clostridiales;D_4_Clostridiales vadinBB60 group;D_5_uncultured bacterium;D_6_uncultured bacterium                                                                                     | NO                        | 2  | TRUE                   |
| D_0_Bacteria;D_1_Firmicutes;D_2_Clostridia;D_3_Clostridiales;D_4 Family XIII;D_5_[Eubacterium] nodatum group;D_6_Eubacterium sp. AB3007                                                                                              | NO                        | 2  | TRUE                   |
| D_0_Bacteria;D_1_Firmicutes;D_2_Clostridia;D_3_Clostridiales;D_4 Family XIII;D_5 Family XIII AD3011 group;D_6_uncultured Clostridiales bacterium                                                                                     | NO                        | 2  | TRUE                   |
| D_0_Bacteria;D_1_Firmicutes;D_2_Clostridia;D_3_Clostridiales;D_4_Lachnospiraceae;D_5_Anaerocolumna;                                                                                                                                  | NO                        | 2  | TRUE                   |
| D_0_Bacteria;D_1_Firmicutes;D_2_Clostridia;D_3_Clostridiales;D_4_Lachnospiraceae;D_5_Lachnospiraceae UCG-009;                                                                                                                        | NO                        | 2  | TRUE                   |
| D_0_Bacteria;D_1_Firmicutes;D_2_Clostridia;D_3_Clostridiales;D_4_Lachnospiraceae;D_5_Pseudobutyrylvibrio;                                                                                                                            | NO                        | 2  | TRUE                   |
| D_0_Bacteria;D_1_Firmicutes;D_2_Clostridia;D_3_Clostridiales;D_4_Peptococcaceae;D_5_uncultured;                                                                                                                                      | NO                        | 2  | TRUE                   |
| D_0_Bacteria;D_1_Firmicutes;D_2_Clostridia;D_3_Clostridiales;D_4_Ruminococcaceae;D_5_Ruminococcaceae UCG-014;D_6_gut metagenome                                                                                                      | NO                        | 2  | TRUE                   |
| D_0_Bacteria;D_1_Firmicutes;D_2_Clostridia;D_3_Clostridiales;D_4_Ruminococcaceae;D_5_Ruminococcaceae UCG-014;D_6_uncultured rumen bacterium SCD-12                                                                                   | NO                        | 2  | TRUE                   |
| D_0_Bacteria;D_1_Firmicutes;D_2_Clostridia;D_3_Clostridiales;D_4_Ruminococcaceae;D_5_Ruminococcus 1;D_6_gut metagenome                                                                                                               | NO                        | 2  | TRUE                   |
| D_0_Bacteria;D_1_Firmicutes;D_2_Clostridia;D_3_Clostridiales;D_4_Ruminococcaceae;D_5_Ruminococcus 1;D_6_uncultured Ruminococcus sp.                                                                                                  | NO                        | 2  | TRUE                   |
| D_0_Bacteria;D_1_Lentisphaerae;D_2_Lentisphaeria;D_3_Victivallales;D_4_Victivallaceae;D_5_uncultured bacterium;D_6_uncultured bacterium                                                                                              | NO                        | 2  | TRUE                   |
| D_0_Bacteria;D_1_Patescibacteria;D_2_Saccharimonadia;D_3_Saccharimonadales;D_4_Saccharimonadaceae;D_5_Candidatus Saccharimonas;D_6_uncultured bacterium                                                                              | NO                        | 2  | TRUE                   |
| **D_0_Bacteria;D_1_Firmicutes;D_2_Bacilli;D_3_Izimaplasmatales;D_4_gut metagenome;D_5_gut metagenome;D_6_gut metagenome                                                                                                              | NO                        | 2  | TRUE                   |

YELLOW highlights indicate a taxa similar to a taxa identified as one of the top 5 differentially abundant taxa on Farm 2 and increased or decreased in the same direction as the taxa on Farm 2.

\*\*formerly in phylum Tenericutes, class Mollicutes

**Supplemental Table 4: Differentially abundant taxa (ANCOM) by CWD Status on Farm 2 at the ASV (similar to strain) level.**

| Microbial Taxa                                                                                                                                                    | Increased in CWD Positive | W   | Reject null hypothesis |
|-------------------------------------------------------------------------------------------------------------------------------------------------------------------|---------------------------|-----|------------------------|
| D_0_Bacteria;D_1_Firmicutes;D_2_Clostridia;D_3_Clostridiales;D_4_Lachnospiraceae;D_5_Lachnospiraceae UCG-010                                                      | YES                       | 176 | TRUE                   |
| **D_0_Bacteria;D_1_Firmicutes;D_2_Bacilli;D_3_RF39;D_4_unidentified rumen bacterium RF9;D_5_unidentified rumen bacterium RF9;D_6_unidentified rumen bacterium RF9 | YES                       | 132 | TRUE                   |
| D_0_Bacteria;D_1_Verrucomicrobia;D_2_Verrucomicrobiae;D_3_Verrucomicrobiales;D_4_Akkermansia;D_5_Akkermansia;D_6_uncultured bacterium                             | YES                       | 90  | TRUE                   |
| D_0_Bacteria;D_1_Firmicutes;D_2_Clostridia;D_3_Clostridiales;D_4_Ruminococcaceae;D_5_Ruminococcaceae NKA4214 group;D_6_uncultured rumen bacterium                 | YES                       | 76  | TRUE                   |
| D_0_Bacteria;D_1_Firmicutes;D_2_Clostridia;D_3_Clostridiales;D_4_Lachnospiraceae                                                                                  | YES                       | 31  | TRUE                   |
| D_0_Bacteria;D_1_Firmicutes;D_2_Clostridia;D_3_Clostridiales;D_4_Christensenellaceae;D_5_uncultured bacterium;D_6_uncultured bacterium                            | YES                       | 22  | TRUE                   |
| D_0_Bacteria;D_1_Firmicutes;D_2_Clostridia;D_3_Clostridiales;D_4_Ruminococcaceae;D_5_Intestinimonas                                                               | NO                        | 22  | TRUE                   |
| D_0_Bacteria;D_1_Firmicutes;D_2_Clostridia;D_3_Clostridiales;D_4_Ruminococcaceae;D_5_Ruminococcaceae UCG-010                                                      | NO                        | 22  | TRUE                   |
| D_0_Bacteria;D_1_Firmicutes;D_2_Clostridia;D_3_Clostridiales;D_4_Christensenellaceae;D_5_Christensenellaceae R-7 group;D_6_uncultured prokaryote                  | NO                        | 19  | TRUE                   |
| D_0_Bacteria;D_1_Firmicutes;D_2_Clostridia;D_3_Clostridiales;D_4_Lachnospiraceae                                                                                  | YES                       | 17  | TRUE                   |
| D_0_Bacteria;D_1_Firmicutes;D_2_Clostridia;D_3_Clostridiales;D_4_Ruminococcaceae;D_5_Ruminococcaceae UCG-010;D_6_uncultured bacterium                             | YES                       | 17  | TRUE                   |
| D_0_Bacteria;D_1_Lentisphaerae;D_2_Lentisphaeria;D_3_Victivallales;D_4_Victivallaceae;D_5_uncultured bacterium;D_6_uncultured bacterium                           | NO                        | 14  | TRUE                   |
| D_0_Bacteria;D_1_Firmicutes;D_2_Clostridia;D_3_Clostridiales;D_4_Defluvitaleaceae;D_5_Defluvitaleaceae UCG-011;D_6_uncultured bacterium                           | NO                        | 13  | TRUE                   |
| D_0_Bacteria;D_1_Elusimicrobia;D_2_Elusimicrobia;D_3_Elusimicrobiales;D_4_Elusimicrobiales;D_5_Elusimicrobiales;D_6_uncultured bacterium                          | NO                        | 11  | TRUE                   |
| D_0_Bacteria;D_1_Firmicutes;D_2_Clostridia;D_3_Clostridiales;D_4_Clostridiales vadinBB60 group;D_5_uncultured bacterium;D_6_uncultured bacterium                  | NO                        | 8   | TRUE                   |
| D_0_Bacteria;D_1_Bacteroidetes;D_2_Bacteroidia;D_3_Bacteroidales;D_4_Rikenellaceae;D_5_dga-11 gut group;D_6_uncultured bacterium                                  | YES                       | 7   | TRUE                   |
| D_0_Bacteria;D_1_Firmicutes;D_2_Clostridia;D_3_Clostridiales;D_4_Clostridiales 1                                                                                  | NO                        | 6   | TRUE                   |
| D_0_Bacteria;D_1_Firmicutes;D_2_Clostridia;D_3_Clostridiales;D_4_Ruminococcaceae;D_5_[Eubacterium] coprostanoligenes group                                        | YES                       | 6   | TRUE                   |
| D_0_Bacteria;D_1_Verrucomicrobia;D_2_Verrucomicrobiae;D_3_Ophthalae;D_4_Punicococcaceae;D_5_uncultured;D_6_metagenome                                             | NO                        | 6   | TRUE                   |
| D_0_Bacteria;D_1_Firmicutes;D_2_Clostridia;D_3_Clostridiales;D_4_Clostridiales 1;D_5_Clostridium sensu stricto 1                                                  | NO                        | 5   | TRUE                   |
| D_0_Bacteria;D_1_Firmicutes;D_2_Clostridia;D_3_Clostridiales;D_4_Clostridiales vadinBB60 group;D_5_uncultured bacterium;D_6_uncultured bacterium                  | YES                       | 5   | TRUE                   |
| D_0_Bacteria;D_1_Firmicutes;D_2_Clostridia;D_3_Clostridiales;D_4_Lachnospiraceae                                                                                  | NO                        | 5   | TRUE                   |
| D_0_Bacteria;D_1_Firmicutes;D_2_Clostridia;D_3_Clostridiales;D_4_Lachnospiraceae;D_5_Coprococcus 2;D_6_uncultured bacterium                                       | NO                        | 5   | TRUE                   |
| D_0_Bacteria;D_1_Firmicutes;D_2_Clostridia;D_3_Clostridiales;D_4_Ruminococcaceae;D_5_[Eubacterium] coprostanoligenes group;D_6_uncultured bacterium               | NO                        | 5   | TRUE                   |
| D_0_Bacteria;D_1_Firmicutes;D_2_Clostridia;D_3_Clostridiales;D_4_Ruminococcaceae;D_5_Ruminococcaceae UCG-010                                                      | NO                        | 5   | TRUE                   |
| D_0_Bacteria;D_1_Firmicutes;D_2_Erysipelotrichia;D_3_Erysipelotrichales;D_4_Erysipelotrichaceae;D_5_Erysipelotrichaceae UCG-004;D_6_uncultured bacterium          | NO                        | 5   | TRUE                   |
| D_0_Bacteria;D_1_Proteobacteria;D_2_Gammaproteobacteria;D_3_Betaproteobacteria;D_4_Rhodocyclaceae                                                                 | NO                        | 5   | TRUE                   |
| **D_0_Bacteria;D_1_Firmicutes;D_2_Bacilli;D_3_Izimaplasmales;D_4_uncultured bacterium;D_5_uncultured bacterium;D_6_uncultured bacterium                           | NO                        | 5   | TRUE                   |
| D_0_Bacteria;D_1_Actinobacteria;D_2_Coriobacteria;D_3_Coriobacteriales;D_4_Atopobacteria;D_5_Atopobium;D_6_uncultured rumen bacterium                             | NO                        | 4   | TRUE                   |
| D_0_Bacteria;D_1_Bacteroidetes;D_2_Bacteroidia;D_3_Bacteroidales;D_4_Marinifilaceae;D_5_Odoribacter;D_6_uncultured bacterium                                      | YES                       | 4   | TRUE                   |
| D_0_Bacteria;D_1_Cyanobacteria;D_2_Melainobacteria;D_3_Gastranaerophilales                                                                                        | NO                        | 4   | TRUE                   |
| D_0_Bacteria;D_1_Firmicutes;D_2_Clostridia;D_3_Clostridiales;D_4_Christensenellaceae;D_5_Christensenellaceae R-7 group                                            | NO                        | 4   | TRUE                   |
| D_0_Bacteria;D_1_Firmicutes;D_2_Clostridia;D_3_Clostridiales;D_4_Christensenellaceae;D_5_Christensenellaceae R-7 group                                            | NO                        | 4   | TRUE                   |
| D_0_Bacteria;D_1_Firmicutes;D_2_Clostridia;D_3_Clostridiales;D_4_Christensenellaceae;D_5_Christensenellaceae R-7 group;D_6_bacterium YE57                         | NO                        | 4   | TRUE                   |
| D_0_Bacteria;D_1_Firmicutes;D_2_Clostridia;D_3_Clostridiales;D_4_Christensenellaceae;D_5_Christensenellaceae R-7 group;D_6_uncultured prokaryote                  | NO                        | 4   | TRUE                   |
| D_0_Bacteria;D_1_Firmicutes;D_2_Clostridia;D_3_Clostridiales;D_4_Christensenellaceae;D_5_Christensenellaceae R-7 group;D_6_uncultured rumen bacterium             | NO                        | 4   | TRUE                   |
| D_0_Bacteria;D_1_Firmicutes;D_2_Clostridia;D_3_Clostridiales;D_4_Clostridiales 1                                                                                  | NO                        | 4   | TRUE                   |
| D_0_Bacteria;D_1_Firmicutes;D_2_Clostridia;D_3_Clostridiales;D_4_Clostridiales vadinBB60 group;D_5_uncultured bacterium;D_6_uncultured bacterium                  | NO                        | 4   | TRUE                   |
| D_0_Bacteria;D_1_Firmicutes;D_2_Clostridia;D_3_Clostridiales;D_4_Clostridiales vadinBB60 group;D_5_uncultured bacterium;D_6_uncultured bacterium                  | NO                        | 4   | TRUE                   |
| D_0_Bacteria;D_1_Firmicutes;D_2_Clostridia;D_3_Clostridiales;D_4_Family XIII;D_5_Family XIII AD3011 group;D_6_uncultured Clostridiales Family XIII bacterium      | NO                        | 4   | TRUE                   |
| D_0_Bacteria;D_1_Firmicutes;D_2_Clostridia;D_3_Clostridiales;D_4_Family XIII;D_5_Mogibacterium;D_6_uncultured rumen bacterium 3C0d-10                             | NO                        | 4   | TRUE                   |
| D_0_Bacteria;D_1_Firmicutes;D_2_Clostridia;D_3_Clostridiales;D_4_Lachnospiraceae                                                                                  | NO                        | 4   | TRUE                   |
| D_0_Bacteria;D_1_Firmicutes;D_2_Clostridia;D_3_Clostridiales;D_4_Lachnospiraceae;D_5_Acetivomaculum;D_6_uncultured bacterium                                      | NO                        | 4   | TRUE                   |
| D_0_Bacteria;D_1_Firmicutes;D_2_Clostridia;D_3_Clostridiales;D_4_Lachnospiraceae;D_5_Coprococcus 1;D_6_uncultured rumen bacterium                                 | NO                        | 4   | TRUE                   |
| D_0_Bacteria;D_1_Firmicutes;D_2_Clostridia;D_3_Clostridiales;D_4_Lachnospiraceae;D_5_Lachnospira;D_6_uncultured bacterium                                         | NO                        | 4   | TRUE                   |
| D_0_Bacteria;D_1_Firmicutes;D_2_Clostridia;D_3_Clostridiales;D_4_Lachnospiraceae;D_5_Lachnospiraceae UCG-008;D_6_uncultured rumen bacterium                       | NO                        | 4   | TRUE                   |
| D_0_Bacteria;D_1_Firmicutes;D_2_Clostridia;D_3_Clostridiales;D_4_Lachnospiraceae;D_5_Shuttleworthia;D_6_uncultured bacterium                                      | NO                        | 4   | TRUE                   |
| D_0_Bacteria;D_1_Firmicutes;D_2_Clostridia;D_3_Clostridiales;D_4_Ruminococcaceae                                                                                  | NO                        | 4   | TRUE                   |
| D_0_Bacteria;D_1_Firmicutes;D_2_Clostridia;D_3_Clostridiales;D_4_Ruminococcaceae                                                                                  | NO                        | 4   | TRUE                   |
| D_0_Bacteria;D_1_Firmicutes;D_2_Clostridia;D_3_Clostridiales;D_4_Ruminococcaceae                                                                                  | NO                        | 4   | TRUE                   |
| D_0_Bacteria;D_1_Firmicutes;D_2_Clostridia;D_3_Clostridiales;D_4_Ruminococcaceae                                                                                  | NO                        | 4   | TRUE                   |
| D_0_Bacteria;D_1_Firmicutes;D_2_Clostridia;D_3_Clostridiales;D_4_Ruminococcaceae;D_5_Ruminococcaceae UCG-002                                                      | NO                        | 4   | TRUE                   |
| D_0_Bacteria;D_1_Firmicutes;D_2_Clostridia;D_3_Clostridiales;D_4_Ruminococcaceae;D_5_Ruminococcaceae UCG-010                                                      | YES                       | 4   | TRUE                   |
| D_0_Bacteria;D_1_Firmicutes;D_2_Clostridia;D_3_Clostridiales;D_4_Ruminococcaceae;D_5_Ruminococcaceae UCG-010;D_6_uncultured bacterium                             | NO                        | 4   | TRUE                   |
| D_0_Bacteria;D_1_Firmicutes;D_2_Clostridia;D_3_Clostridiales;D_4_Ruminococcaceae;D_5_Ruminococcaceae UCG-010;D_6_uncultured bacterium                             | NO                        | 4   | TRUE                   |
| D_0_Bacteria;D_1_Firmicutes;D_2_Clostridia;D_3_Clostridiales;D_4_Ruminococcaceae;D_5_Ruminococcaceae UCG-010;D_6_uncultured bacterium                             | NO                        | 4   | TRUE                   |
| D_0_Bacteria;D_1_Firmicutes;D_2_Clostridia;D_3_Clostridiales;D_4_Ruminococcaceae;D_5_Ruminococcaceae UCG-010;D_6_uncultured bacterium                             | NO                        | 4   | TRUE                   |
| D_0_Bacteria;D_1_Firmicutes;D_2_Clostridia;D_3_Clostridiales;D_4_Ruminococcaceae;D_5_Ruminococcaceae UCG-013;D_6_uncultured Clostridiales bacterium               | NO                        | 4   | TRUE                   |
| D_0_Bacteria;D_1_Firmicutes;D_2_Clostridia;D_3_Clostridiales;D_4_Ruminococcaceae;D_5_Ruminococcus 1                                                               | NO                        | 4   | TRUE                   |
| D_0_Bacteria;D_1_Firmicutes;D_2_Clostridia;D_3_Clostridiales;D_4_Ruminococcaceae;D_5_Ruminococcus 2;D_6_uncultured rumen bacterium                                | NO                        | 4   | TRUE                   |
| D_0_Bacteria;D_1_Firmicutes;D_2_Erysipelotrichia;D_3_Erysipelotrichales;D_4_Erysipelotrichaceae;D_5_Dielma;D_6_uncultured bacterium                               | NO                        | 4   | TRUE                   |
| D_0_Bacteria;D_1_Firmicutes;D_2_Negativicutes;D_3_Selenomonadales;D_4_Acidaminococcaceae;D_5_Phascococcobacterium;D_6_uncultured Veillonellaceae bacterium        | NO                        | 4   | TRUE                   |
| D_0_Bacteria;D_1_Lentisphaerae;D_2_Lentisphaeria;D_3_Victivallales;D_4_Victivallaceae                                                                             | NO                        | 4   | TRUE                   |
| D_0_Bacteria;D_1_Proteobacteria;D_2_Alphaproteobacteria;D_3_Rhizobiales;D_4_Rhizobiaceae;D_5_Aureimonas                                                           | NO                        | 4   | TRUE                   |
| D_0_Bacteria;D_1_Proteobacteria;D_2_Deltaproteobacteria;D_3_Desulfobrivionales;D_4_Desulfobrivionaceae;D_5_Desulfobrivio                                          | NO                        | 4   | TRUE                   |
| D_0_Bacteria;D_1_Bacteroidetes;D_2_Bacteroidia;D_3_Bacteroidales;D_4_Prevotellaceae;D_5_Prevotella 1;D_6_uncultured bacterium                                     | NO                        | 3   | TRUE                   |
| D_0_Bacteria;D_1_Bacteroidetes;D_2_Bacteroidia;D_3_Bacteroidales;D_4_Prevotellaceae;D_5_Prevotellaceae UCG-004;D_6_uncultured Bacteroidales bacterium             | YES                       | 3   | TRUE                   |
| D_0_Bacteria;D_1_Firmicutes;D_2_Clostridia;D_3_Clostridiales                                                                                                      | NO                        | 3   | TRUE                   |
| D_0_Bacteria;D_1_Firmicutes;D_2_Clostridia;D_3_Clostridiales;D_4_Christensenellaceae;D_5_Christensenellaceae R-7 group                                            | NO                        | 3   | TRUE                   |
| D_0_Bacteria;D_1_Firmicutes;D_2_Clostridia;D_3_Clostridiales;D_4_Christensenellaceae;D_5_Christensenellaceae R-7 group                                            | NO                        | 3   | TRUE                   |
| D_0_Bacteria;D_1_Firmicutes;D_2_Clostridia;D_3_Clostridiales;D_4_Clostridiales 1                                                                                  | NO                        | 3   | TRUE                   |
| D_0_Bacteria;D_1_Firmicutes;D_2_Clostridia;D_3_Clostridiales;D_4_Clostridiales vadinBB60 group;D_5_uncultured bacterium;D_6_uncultured bacterium                  | NO                        | 3   | TRUE                   |
| D_0_Bacteria;D_1_Firmicutes;D_2_Clostridia;D_3_Clostridiales;D_4_Clostridiales vadinBB60 group;D_5_uncultured bacterium;D_6_uncultured bacterium                  | NO                        | 3   | TRUE                   |

### Supplemental Table 4 Continued: Differentially abundant taxa (ANCOM) by CWD Status on Farm 2 at the ASV (similar to strain) level.

| Microbial Taxa                                                                                                                                                                        | Increased in CWD Positive | W | Reject null hypothesis |
|---------------------------------------------------------------------------------------------------------------------------------------------------------------------------------------|---------------------------|---|------------------------|
| D_0_Bacteria;D_1_Firmicutes;D_2_Clostridia;D_3_Clostridiales;D_4_Clostridiales vadinB860 group;D_5_uncultured bacterium;D_6_uncultured bacterium                                      | NO                        | 3 | TRUE                   |
| D_0_Bacteria;D_1_Firmicutes;D_2_Clostridia;D_3_Clostridiales;D_4_Clostridiales vadinB860 group;D_5_uncultured bacterium;D_6_uncultured bacterium                                      | NO                        | 3 | TRUE                   |
| D_0_Bacteria;D_1_Firmicutes;D_2_Clostridia;D_3_Clostridiales;D_4_Clostridiales vadinB860 group;D_5_uncultured bacterium;D_6_uncultured bacterium                                      | NO                        | 3 | TRUE                   |
| D_0_Bacteria;D_1_Firmicutes;D_2_Clostridia;D_3_Clostridiales;D_4_Clostridiales vadinB860 group;D_5_uncultured rumen bacterium;D_6_uncultured rumen bacterium                          | NO                        | 3 | TRUE                   |
| D_0_Bacteria;D_1_Firmicutes;D_2_Clostridia;D_3_Clostridiales;D_4_Eubacteriaceae;D_5_Anaerofustis;D_6_uncultured bacterium                                                             | YES                       | 3 | TRUE                   |
| D_0_Bacteria;D_1_Firmicutes;D_2_Clostridia;D_3_Clostridiales;D_4_Family XIII                                                                                                          | NO                        | 3 | TRUE                   |
| D_0_Bacteria;D_1_Firmicutes;D_2_Clostridia;D_3_Clostridiales;D_4_Family XIII;D_5_Anaerovorax;D_6_uncultured bacterium                                                                 | NO                        | 3 | TRUE                   |
| D_0_Bacteria;D_1_Firmicutes;D_2_Clostridia;D_3_Clostridiales;D_4_Family XIII;D_5_Family XIII UCG-001;D_6_uncultured bacterium                                                         | NO                        | 3 | TRUE                   |
| D_0_Bacteria;D_1_Firmicutes;D_2_Clostridia;D_3_Clostridiales;D_4_Lachnospiraceae                                                                                                      | NO                        | 3 | TRUE                   |
| D_0_Bacteria;D_1_Firmicutes;D_2_Clostridia;D_3_Clostridiales;D_4_Lachnospiraceae                                                                                                      | NO                        | 3 | TRUE                   |
| D_0_Bacteria;D_1_Firmicutes;D_2_Clostridia;D_3_Clostridiales;D_4_Lachnospiraceae                                                                                                      | NO                        | 3 | TRUE                   |
| D_0_Bacteria;D_1_Firmicutes;D_2_Clostridia;D_3_Clostridiales;D_4_Lachnospiraceae;D_5_Acetomaculum;D_6_uncultured bacterium                                                            | NO                        | 3 | TRUE                   |
| D_0_Bacteria;D_1_Firmicutes;D_2_Clostridia;D_3_Clostridiales;D_4_Ruminococcaceae                                                                                                      | NO                        | 3 | TRUE                   |
| D_0_Bacteria;D_1_Firmicutes;D_2_Clostridia;D_3_Clostridiales;D_4_Ruminococcaceae;D_5_[Eubacterium] coprostanoligenes group;D_6_uncultured bacterium                                   | NO                        | 3 | TRUE                   |
| D_0_Bacteria;D_1_Firmicutes;D_2_Clostridia;D_3_Clostridiales;D_4_Ruminococcaceae;D_5_Oscillibacter                                                                                    | NO                        | 3 | TRUE                   |
| D_0_Bacteria;D_1_Firmicutes;D_2_Clostridia;D_3_Clostridiales;D_4_Ruminococcaceae;D_5_Ruminococcaceae UCG-002                                                                          | NO                        | 3 | TRUE                   |
| D_0_Bacteria;D_1_Firmicutes;D_2_Clostridia;D_3_Clostridiales;D_4_Ruminococcaceae;D_5_Ruminococcaceae NK4A214 group;D_6_uncultured bacterium                                           | NO                        | 3 | TRUE                   |
| D_0_Bacteria;D_1_Firmicutes;D_2_Clostridia;D_3_Clostridiales;D_4_Ruminococcaceae;D_5_Ruminococcaceae UCG-002                                                                          | NO                        | 3 | TRUE                   |
| D_0_Bacteria;D_1_Firmicutes;D_2_Clostridia;D_3_Clostridiales;D_4_Ruminococcaceae;D_5_Ruminococcaceae UCG-005;D_6_uncultured Ruminococcaceae bacterium                                 | YES                       | 3 | TRUE                   |
| D_0_Bacteria;D_1_Firmicutes;D_2_Clostridia;D_3_Clostridiales;D_4_Ruminococcaceae;D_5_Ruminococcaceae UCG-010                                                                          | NO                        | 3 | TRUE                   |
| D_0_Bacteria;D_1_Firmicutes;D_2_Clostridia;D_3_Clostridiales;D_4_Ruminococcaceae;D_5_Ruminococcaceae UCG-010                                                                          | NO                        | 3 | TRUE                   |
| D_0_Bacteria;D_1_Firmicutes;D_2_Clostridia;D_3_Clostridiales;D_4_Ruminococcaceae;D_5_Ruminococcaceae UCG-010                                                                          | NO                        | 3 | TRUE                   |
| D_0_Bacteria;D_1_Firmicutes;D_2_Clostridia;D_3_Clostridiales;D_4_Ruminococcaceae;D_5_Ruminococcaceae UCG-010;D_6_uncultured bacterium                                                 | NO                        | 3 | TRUE                   |
| D_0_Bacteria;D_1_Firmicutes;D_2_Clostridia;D_3_Clostridiales;D_4_Ruminococcaceae;D_5_Ruminococcaceae UCG-010;D_6_uncultured bacterium                                                 | NO                        | 3 | TRUE                   |
| D_0_Bacteria;D_1_Firmicutes;D_2_Clostridia;D_3_Clostridiales;D_4_Ruminococcaceae;D_5_Ruminococcaceae UCG-010;D_6_uncultured bacterium                                                 | NO                        | 3 | TRUE                   |
| D_0_Bacteria;D_1_Firmicutes;D_2_Clostridia;D_3_Clostridiales;D_4_Ruminococcaceae;D_5_Ruminococcaceae UCG-010;D_6_uncultured bacterium                                                 | NO                        | 3 | TRUE                   |
| D_0_Bacteria;D_1_Firmicutes;D_2_Clostridia;D_3_Clostridiales;D_4_Ruminococcaceae;D_5_Ruminococcaceae UCG-010;D_6_uncultured bacterium                                                 | NO                        | 3 | TRUE                   |
| D_0_Bacteria;D_1_Firmicutes;D_2_Clostridia;D_3_Clostridiales;D_4_Ruminococcaceae;D_5_Ruminococcaceae UCG-010;D_6_uncultured bacterium                                                 | NO                        | 3 | TRUE                   |
| D_0_Bacteria;D_1_Firmicutes;D_2_Clostridia;D_3_Clostridiales;D_4_Ruminococcaceae;D_5_Ruminococcaceae UCG-010;D_6_uncultured bacterium                                                 | NO                        | 3 | TRUE                   |
| D_0_Bacteria;D_1_Firmicutes;D_2_Clostridia;D_3_Clostridiales;D_4_Ruminococcaceae;D_5_Ruminococcaceae UCG-013                                                                          | NO                        | 3 | TRUE                   |
| D_0_Bacteria;D_1_Firmicutes;D_2_Clostridia;D_3_Clostridiales;D_4_Ruminococcaceae;D_5_Ruminococcaceae UCG-013;D_6_uncultured bacterium                                                 | NO                        | 3 | TRUE                   |
| D_0_Bacteria;D_1_Firmicutes;D_2_Clostridia;D_3_Clostridiales;D_4_Ruminococcaceae;D_5_Ruminococcaceae UCG-014                                                                          | NO                        | 3 | TRUE                   |
| D_0_Bacteria;D_1_Firmicutes;D_2_Clostridia;D_3_Clostridiales;D_4_Ruminococcaceae;D_5_Ruminococcaceae UCG-014;D_6_uncultured bacterium                                                 | NO                        | 3 | TRUE                   |
| D_0_Bacteria;D_1_Firmicutes;D_2_Clostridia;D_3_Clostridiales;D_4_Ruminococcaceae;D_5_Ruminococcus 1                                                                                   | YES                       | 3 | TRUE                   |
| D_0_Bacteria;D_1_Firmicutes;D_2_Clostridia;D_3_Clostridiales;D_4_Ruminococcaceae;D_5_Saccharofermentans;D_6_uncultured rumen bacterium SCD4                                           | NO                        | 3 | TRUE                   |
| D_0_Bacteria;D_1_Firmicutes;D_2_Erysipelotrichia;D_3_Erysipelotrichales;D_4_Erysipelotrichaceae;D_5_Brennania;D_6_uncultured bacterium                                                | NO                        | 3 | TRUE                   |
| D_0_Bacteria;D_1_Firmicutes;D_2_Erysipelotrichia;D_3_Erysipelotrichales;D_4_Erysipelotrichaceae;D_5_Erysipelatoclostridium;D_6_uncultured bacterium                                   | NO                        | 3 | TRUE                   |
| D_0_Bacteria;D_1_Firmicutes;D_2_Erysipelotrichia;D_3_Erysipelotrichales;D_4_Erysipelotrichaceae;D_5_uncultured;D_6_uncultured bacterium                                               | NO                        | 3 | TRUE                   |
| D_0_Bacteria;D_1_Proteobacteria;D_2_Alphaproteobacteria;D_3_Rhizobiales;D_4_Rhizobiales;D_5_Alfarhizobium-Neorhizobium-Pararhizobium-Rhizobium                                        | NO                        | 3 | TRUE                   |
| D_0_Bacteria;D_1_Proteobacteria;D_2_Alphaproteobacteria;D_3_Rhizobiales;D_4_uncultured;D_5_uncultured bacterium;D_6_uncultured bacterium                                              | NO                        | 3 | TRUE                   |
| **D_0_Bacteria;D_1_Firmicutes;D_2_Bacilli;D_3_Izimaplasmales                                                                                                                          | NO                        | 3 | TRUE                   |
| **D_0_Bacteria;D_1_Firmicutes;D_2_Bacilli;D_3_RF39                                                                                                                                    | NO                        | 3 | TRUE                   |
| D_0_Bacteria;D_1_Bacteroidetes;D_2_Bacteroidia;D_3_Bacteroidales;D_4_Bacteroidaceae;D_5_Bacteroides;D_6_uncultured bacterium                                                          | YES                       | 2 | TRUE                   |
| D_0_Bacteria;D_1_Bacteroidetes;D_2_Bacteroidia;D_3_Bacteroidales;D_4_Bacteroidales RF16 group;D_5_uncultured Porphyromonadaceae bacterium;D_6_uncultured Porphyromonadaceae bacterium | NO                        | 2 | TRUE                   |
| D_0_Bacteria;D_1_Bacteroidetes;D_2_Bacteroidia;D_3_Bacteroidales;D_4_Barnesiellaceae;D_5_uncultured                                                                                   | NO                        | 2 | TRUE                   |
| D_0_Bacteria;D_1_Bacteroidetes;D_2_Bacteroidia;D_3_Bacteroidales;D_4_Munibaculaceae;D_5_uncultured bacterium;D_6_uncultured bacterium                                                 | YES                       | 2 | TRUE                   |
| D_0_Bacteria;D_1_Bacteroidetes;D_2_Bacteroidia;D_3_Bacteroidales;D_4_Rikenellaceae;D_5_Alistipes                                                                                      | YES                       | 2 | TRUE                   |
| D_0_Bacteria;D_1_Cyanobacteria;D_2_Melainabacteria;D_3_Gastranaerophiales                                                                                                             | NO                        | 2 | TRUE                   |
| D_0_Bacteria;D_1_Cyanobacteria;D_2_Melainabacteria;D_3_Gastranaerophiales                                                                                                             | YES                       | 2 | TRUE                   |
| D_0_Bacteria;D_1_Cyanobacteria;D_2_Melainabacteria;D_3_Gastranaerophiales;D_4_uncultured rumen bacterium;D_5_uncultured rumen bacterium;D_6_uncultured rumen bacterium                | YES                       | 2 | TRUE                   |
| D_0_Bacteria;D_1_Firmicutes;D_2_Clostridia;D_3_Clostridiales                                                                                                                          | NO                        | 2 | TRUE                   |
| D_0_Bacteria;D_1_Firmicutes;D_2_Clostridia;D_3_Clostridiales;D_4_Christensenellaceae;D_5_Christensenellaceae R-7 group                                                                | YES                       | 2 | TRUE                   |
| D_0_Bacteria;D_1_Firmicutes;D_2_Clostridia;D_3_Clostridiales;D_4_Christensenellaceae;D_5_Christensenellaceae R-7 group                                                                | NO                        | 2 | TRUE                   |
| D_0_Bacteria;D_1_Firmicutes;D_2_Clostridia;D_3_Clostridiales;D_4_Christensenellaceae;D_5_Christensenellaceae R-7 group;D_6_uncultured Clostridia bacterium                            | YES                       | 2 | TRUE                   |
| D_0_Bacteria;D_1_Firmicutes;D_2_Clostridia;D_3_Clostridiales;D_4_Christensenellaceae;D_5_Christensenellaceae R-7 group;D_6_uncultured prokaryote                                      | NO                        | 2 | TRUE                   |
| D_0_Bacteria;D_1_Firmicutes;D_2_Clostridia;D_3_Clostridiales;D_4_Clostridiales vadinB860 group;D_5_uncultured bacterium;D_6_uncultured bacterium                                      | NO                        | 2 | TRUE                   |
| D_0_Bacteria;D_1_Firmicutes;D_2_Clostridia;D_3_Clostridiales;D_4_Clostridiales vadinB860 group;D_5_uncultured bacterium;D_6_uncultured bacterium                                      | NO                        | 2 | TRUE                   |
| D_0_Bacteria;D_1_Firmicutes;D_2_Clostridia;D_3_Clostridiales;D_4_Clostridiales vadinB860 group;D_5_uncultured bacterium;D_6_uncultured bacterium                                      | NO                        | 2 | TRUE                   |
| D_0_Bacteria;D_1_Firmicutes;D_2_Clostridia;D_3_Clostridiales;D_4_Clostridiales vadinB860 group;D_5_uncultured bacterium;D_6_uncultured bacterium                                      | YES                       | 2 | TRUE                   |
| D_0_Bacteria;D_1_Firmicutes;D_2_Clostridia;D_3_Clostridiales;D_4_Family XIII;D_5_Mogibacterium;D_6_uncultured rumen bacterium                                                         | NO                        | 2 | TRUE                   |
| D_0_Bacteria;D_1_Firmicutes;D_2_Clostridia;D_3_Clostridiales;D_4_Lachnospiraceae                                                                                                      | NO                        | 2 | TRUE                   |
| D_0_Bacteria;D_1_Firmicutes;D_2_Clostridia;D_3_Clostridiales;D_4_Lachnospiraceae                                                                                                      | NO                        | 2 | TRUE                   |
| D_0_Bacteria;D_1_Firmicutes;D_2_Clostridia;D_3_Clostridiales;D_4_Lachnospiraceae                                                                                                      | NO                        | 2 | TRUE                   |
| D_0_Bacteria;D_1_Firmicutes;D_2_Clostridia;D_3_Clostridiales;D_4_Lachnospiraceae                                                                                                      | YES                       | 2 | TRUE                   |
| D_0_Bacteria;D_1_Firmicutes;D_2_Clostridia;D_3_Clostridiales;D_4_Lachnospiraceae;D_5_Blautila                                                                                         | NO                        | 2 | TRUE                   |
| D_0_Bacteria;D_1_Firmicutes;D_2_Clostridia;D_3_Clostridiales;D_4_Lachnospiraceae;D_5_Coprococcus 3;D_6_uncultured bacterium                                                           | NO                        | 2 | TRUE                   |
| D_0_Bacteria;D_1_Firmicutes;D_2_Clostridia;D_3_Clostridiales;D_4_Lachnospiraceae;D_5_Lachnospiraceae AC2044 group;D_6_uncultured rumen bacterium                                      | NO                        | 2 | TRUE                   |
| D_0_Bacteria;D_1_Firmicutes;D_2_Clostridia;D_3_Clostridiales;D_4_Lachnospiraceae;D_5_Lachnospiraceae NK4A136 group;D_6_uncultured Lachnospiraceae bacterium                           | YES                       | 2 | TRUE                   |
| D_0_Bacteria;D_1_Firmicutes;D_2_Clostridia;D_3_Clostridiales;D_4_Lachnospiraceae;D_5_Lachnospiraceae UCG-010;D_6_uncultured rumen bacterium                                           | YES                       | 2 | TRUE                   |
| D_0_Bacteria;D_1_Firmicutes;D_2_Clostridia;D_3_Clostridiales;D_4_Lachnospiraceae;D_5_Tyzzerella 4;D_6_uncultured bacterium                                                            | NO                        | 2 | TRUE                   |
| D_0_Bacteria;D_1_Firmicutes;D_2_Clostridia;D_3_Clostridiales;D_4_Ruminococcaceae                                                                                                      | NO                        | 2 | TRUE                   |
| D_0_Bacteria;D_1_Firmicutes;D_2_Clostridia;D_3_Clostridiales;D_4_Ruminococcaceae;D_5_GCA-900066225;D_6_uncultured bacterium                                                           | YES                       | 2 | TRUE                   |
| D_0_Bacteria;D_1_Firmicutes;D_2_Clostridia;D_3_Clostridiales;D_4_Ruminococcaceae;D_5_Oscillospira;D_6_uncultured bacterium                                                            | NO                        | 2 | TRUE                   |
| D_0_Bacteria;D_1_Firmicutes;D_2_Clostridia;D_3_Clostridiales;D_4_Ruminococcaceae;D_5_Papillibacter;D_6_uncultured Clostridiales bacterium                                             | NO                        | 2 | TRUE                   |
| D_0_Bacteria;D_1_Firmicutes;D_2_Clostridia;D_3_Clostridiales;D_4_Ruminococcaceae;D_5_Ruminococcaceae;D_6_uncultured Clostridium 1                                                     | YES                       | 2 | TRUE                   |

**Supplemental Table 4 Continued:** Differentially abundant taxa (ANCOM) by CWD Status on Farm 2 at the ASV (similar to strain) level.

| Microbial Taxa                                                                                                                                                                                    | Increased in CWD Positive | W | Reject null hypothesis |
|---------------------------------------------------------------------------------------------------------------------------------------------------------------------------------------------------|---------------------------|---|------------------------|
| D_0_Bacteria;D_1_Firmicutes;D_2_Clostridia;D_3_Clostridiales;D_4_Ruminococcaceae;D_5_Ruminococcaceae UCG-005                                                                                      | NO                        | 2 | TRUE                   |
| D_0_Bacteria;D_1_Firmicutes;D_2_Clostridia;D_3_Clostridiales;D_4_Ruminococcaceae;D_5_Ruminococcaceae UCG-005                                                                                      | YES                       | 2 | TRUE                   |
| D_0_Bacteria;D_1_Firmicutes;D_2_Clostridia;D_3_Clostridiales;D_4_Ruminococcaceae;D_5_Ruminococcaceae UCG-005;D_6_uncultured bacterium                                                             | NO                        | 2 | TRUE                   |
| D_0_Bacteria;D_1_Firmicutes;D_2_Clostridia;D_3_Clostridiales;D_4_Ruminococcaceae;D_5_Ruminococcaceae UCG-010                                                                                      | NO                        | 2 | TRUE                   |
| D_0_Bacteria;D_1_Firmicutes;D_2_Clostridia;D_3_Clostridiales;D_4_Ruminococcaceae;D_5_Ruminococcaceae UCG-010                                                                                      | NO                        | 2 | TRUE                   |
| D_0_Bacteria;D_1_Firmicutes;D_2_Clostridia;D_3_Clostridiales;D_4_Ruminococcaceae;D_5_Ruminococcaceae UCG-010;D_6_uncultured bacterium                                                             | NO                        | 2 | TRUE                   |
| D_0_Bacteria;D_1_Firmicutes;D_2_Clostridia;D_3_Clostridiales;D_4_Ruminococcaceae;D_5_Ruminococcaceae UCG-010;D_6_uncultured bacterium                                                             | NO                        | 2 | TRUE                   |
| D_0_Bacteria;D_1_Firmicutes;D_2_Clostridia;D_3_Clostridiales;D_4_Ruminococcaceae;D_5_Ruminococcaceae UCG-010;D_6_uncultured bacterium                                                             | NO                        | 2 | TRUE                   |
| D_0_Bacteria;D_1_Firmicutes;D_2_Clostridia;D_3_Clostridiales;D_4_Ruminococcaceae;D_5_Ruminococcaceae UCG-013;D_6_uncultured bacterium                                                             | NO                        | 2 | TRUE                   |
| D_0_Bacteria;D_1_Firmicutes;D_2_Clostridia;D_3_Clostridiales;D_4_Ruminococcaceae;D_5_Ruminococcaceae UCG-013;D_6_uncultured bacterium                                                             | YES                       | 2 | TRUE                   |
| D_0_Bacteria;D_1_Firmicutes;D_2_Clostridia;D_3_Clostridiales;D_4_Ruminococcaceae;D_5_Ruminococcaceae UCG-014                                                                                      | YES                       | 2 | TRUE                   |
| D_0_Bacteria;D_1_Firmicutes;D_2_Clostridia;D_3_Clostridiales;D_4_Ruminococcaceae;D_5_Ruminococcaceae UCG-014                                                                                      | NO                        | 2 | TRUE                   |
| D_0_Bacteria;D_1_Firmicutes;D_2_Clostridia;D_3_Clostridiales;D_4_Ruminococcaceae;D_5_Ruminococcaceae UCG-014                                                                                      | NO                        | 2 | TRUE                   |
| D_0_Bacteria;D_1_Firmicutes;D_2_Clostridia;D_3_Clostridiales;D_4_Ruminococcaceae;D_5_Ruminococcaceae UCG-014;D_6_uncultured bacterium                                                             | NO                        | 2 | TRUE                   |
| D_0_Bacteria;D_1_Firmicutes;D_2_Clostridia;D_3_Clostridiales;D_4_Ruminococcaceae;D_5_Ruminococcaceae UCG-014;D_6_unidentified rumen bacterium JW32                                                | YES                       | 2 | TRUE                   |
| D_0_Bacteria;D_1_Firmicutes;D_2_Clostridia;D_3_Clostridiales;D_4_Ruminococcaceae;D_5_Ruminococcus 1                                                                                               | NO                        | 2 | TRUE                   |
| D_0_Bacteria;D_1_Firmicutes;D_2_Clostridia;D_3_Clostridiales;D_4_Ruminococcaceae;D_5_Saccharofermentans                                                                                           | NO                        | 2 | TRUE                   |
| D_0_Bacteria;D_1_Firmicutes;D_2_Clostridia;D_3_Clostridiales;D_4_Ruminococcaceae;D_5_uncultured                                                                                                   | NO                        | 2 | TRUE                   |
| D_0_Bacteria;D_1_Firmicutes;D_2_Erysipelotrichia;D_3_Erysipelotrichales;D_4_Erysipelotrichaceae                                                                                                   | NO                        | 2 | TRUE                   |
| D_0_Bacteria;D_1_Firmicutes;D_2_Erysipelotrichia;D_3_Erysipelotrichales;D_4_Erysipelotrichaceae;D_5_Candidatus Stoquefichus;D_6_uncultured bacterium                                              | NO                        | 2 | TRUE                   |
| D_0_Bacteria;D_1_Proteobacteria;D_2_Alphaproteobacteria;D_3_Rhodospirillales;D_4_uncultured;D_5_gut metagenome;D_6_gut metagenome                                                                 | NO                        | 2 | TRUE                   |
| D_0_Bacteria;D_1_Proteobacteria;D_2_Alphaproteobacteria;D_3_Rhodospirillales;D_4_uncultured;D_5_uncultured bacterium;D_6_uncultured bacterium                                                     | NO                        | 2 | TRUE                   |
| **D_0_Bacteria;D_1_Firmicutes;D_2_Bacilli;D_3_Anaeroplasmatales;D_4_Anaeroplasmataceae;D_5_Anaeroplasmataceae;D_6_uncultured bacterium                                                            | YES                       | 2 | TRUE                   |
| **D_0_Bacteria;D_1_Firmicutes;D_2_Bacilli;D_3_Izimaplasmatales;D_4_uncultured bacterium;D_5_uncultured bacterium;D_6_uncultured bacterium                                                         | YES                       | 2 | TRUE                   |
| **D_0_Bacteria;D_1_Firmicutes;D_2_Bacilli;D_3_RF39                                                                                                                                                | NO                        | 2 | TRUE                   |
| **D_0_Bacteria;D_1_Firmicutes;D_2_Bacilli;D_3_RF39                                                                                                                                                | NO                        | 2 | TRUE                   |
| YELLOW highlights indicate a taxa similar to a taxa identified as one of the top 5 differentially abundant taxa on Farm 1 and increased or decreased in the same direction as the taxa on Farm 1. |                           |   |                        |
| **formerly phylum Tenericutes, class Mollicutes                                                                                                                                                   |                           |   |                        |
